# Supplementary material for: Intestinal butyrate-metabolizing species contribute to autoantibody production and bone erosion in rheumatoid arthritis
Source: PubMed Central journal article supplement — Sci Adv. 2022 Feb 11;8(6):eabm1511. doi: 10.1126/sciadv.abm1511 (PMC11093108; doi:10.1126/sciadv.abm1511), 2022-02-11
Supplement: sciadv.abm1511_sm.pdf [file sciadv.abm1511_sm.pdf]

Supplementary Materials for

**Intestinal butyrate-metabolizing species contribute to autoantibody production and bone erosion in rheumatoid arthritis**

Jing He\*, Yanan Chu, Jing Li, Qingren Meng, Yudong Liu, Jiayang Jin, Yifan Wang, Jian Wang, Bo Huang, Lianjie Shi, Xing Shi, Jiayi Tian, Yunzhi Zhufeng, Ruiling Feng, Wenjing Xiao, Yuzhou Gan, Jianping Guo, Changjun Shao, Yin Su, Fanlei Hu, Xiaolin Sun, Jun Yu\*, Yu Kang\*, Zhanguo Li\*

\*Corresponding author. Email: li99@bjmu.edu.cn (Z.L.); kangy@big.ac.cn (Y.K.); junyu@big.ac.cn (J.Y.); hejing1105@126.com (J.H.)

Published 11 February 2022, *Sci. Adv.* **8**, eabm1511 (2022)  
DOI: 10.1126/sciadv.abm1511

**The PDF file includes:**

Figs. S1 to S11  
Tables S1 to S7

**Other Supplementary Material for this manuscript includes the following:**

Excel file S1 to S7

Fig S1

A

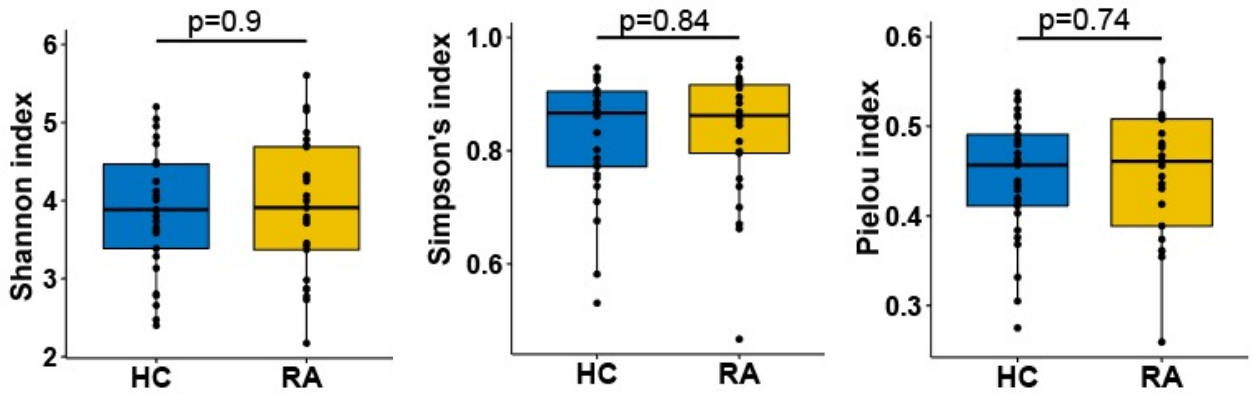

B

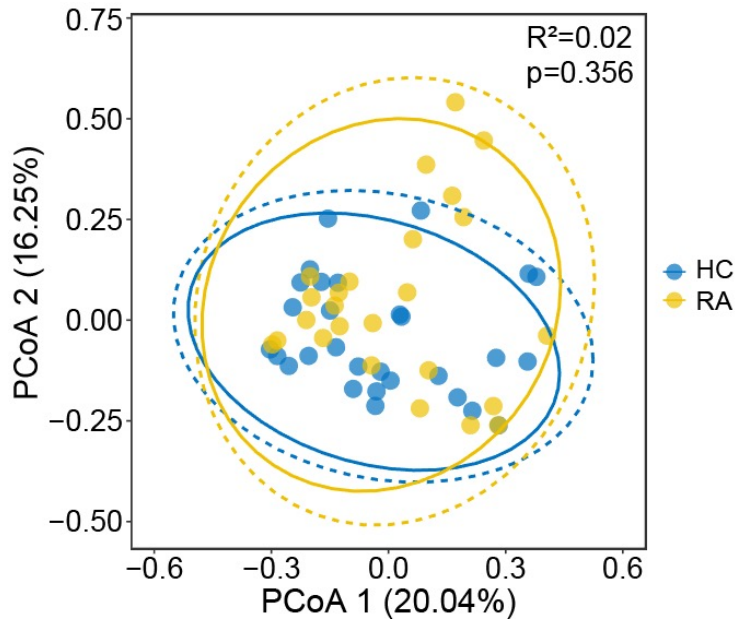

**Fig S1. Biodiversity in RA vs control subjects of the NORA cohort.** **A.** The alpha-diversity of the microbiome in RA patients and controls of the NORA cohort. HC, healthy control group, n=29; RA, rheumatoid arthritis group, n=25. Mann-Whitney U test. **B.** The beta-diversity of the microbiome in RA patients and controls by principal coordinate analysis (PCoA) of Bray-Curtis dissimilarity (PERMANOVA,  $R^2 = 0.02$ ,  $p = 0.356$ ).

**Fig S2**

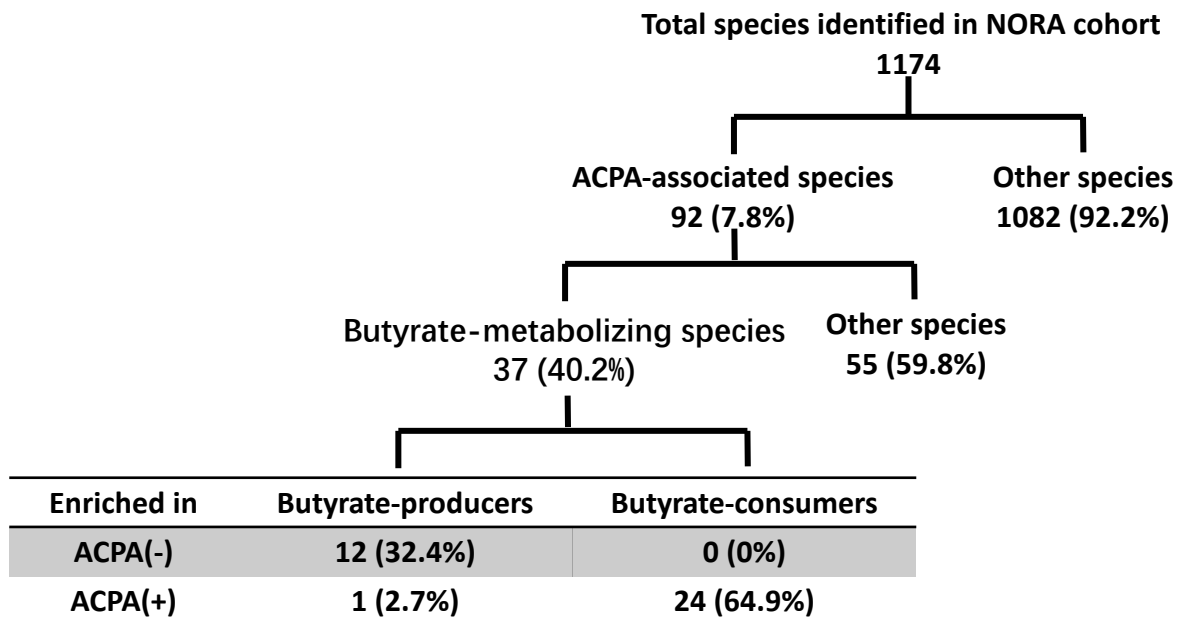

**Fig.S2 Distribution of butyrate-metabolizing species among 92 ACPA-associated species**

In NORA cohort, we identified 92 ACPA-associated species, 37/92 (40.2%) were butyrate-metabolizing species. Among them, 64.9% (24/37) butyrate-consumers and only 2.7% (1/37) butyrate-producers were enriched in ACPA (+) group, whereas 32.4% (12/37) butyrate-producers were enriched in ACPA (-) group with no butyrate-consumers.

Fig. S3

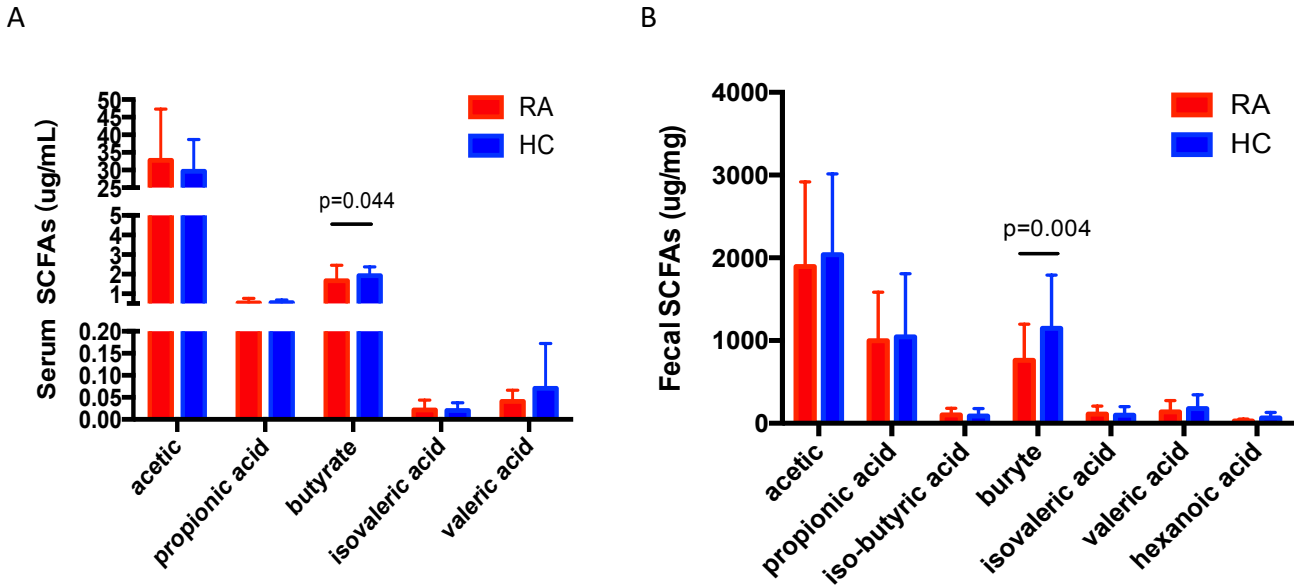

**Fig. S3 Serum and fecal concentration of SCFA in subject of the treated cohort.**

The levels of SCFAs in patients of cohort I were tested. **A.** Serum levels of SCFA in patients vs. controls. **B.** Fecal levels of SCFA in patients vs. controls.

Fig.S4.

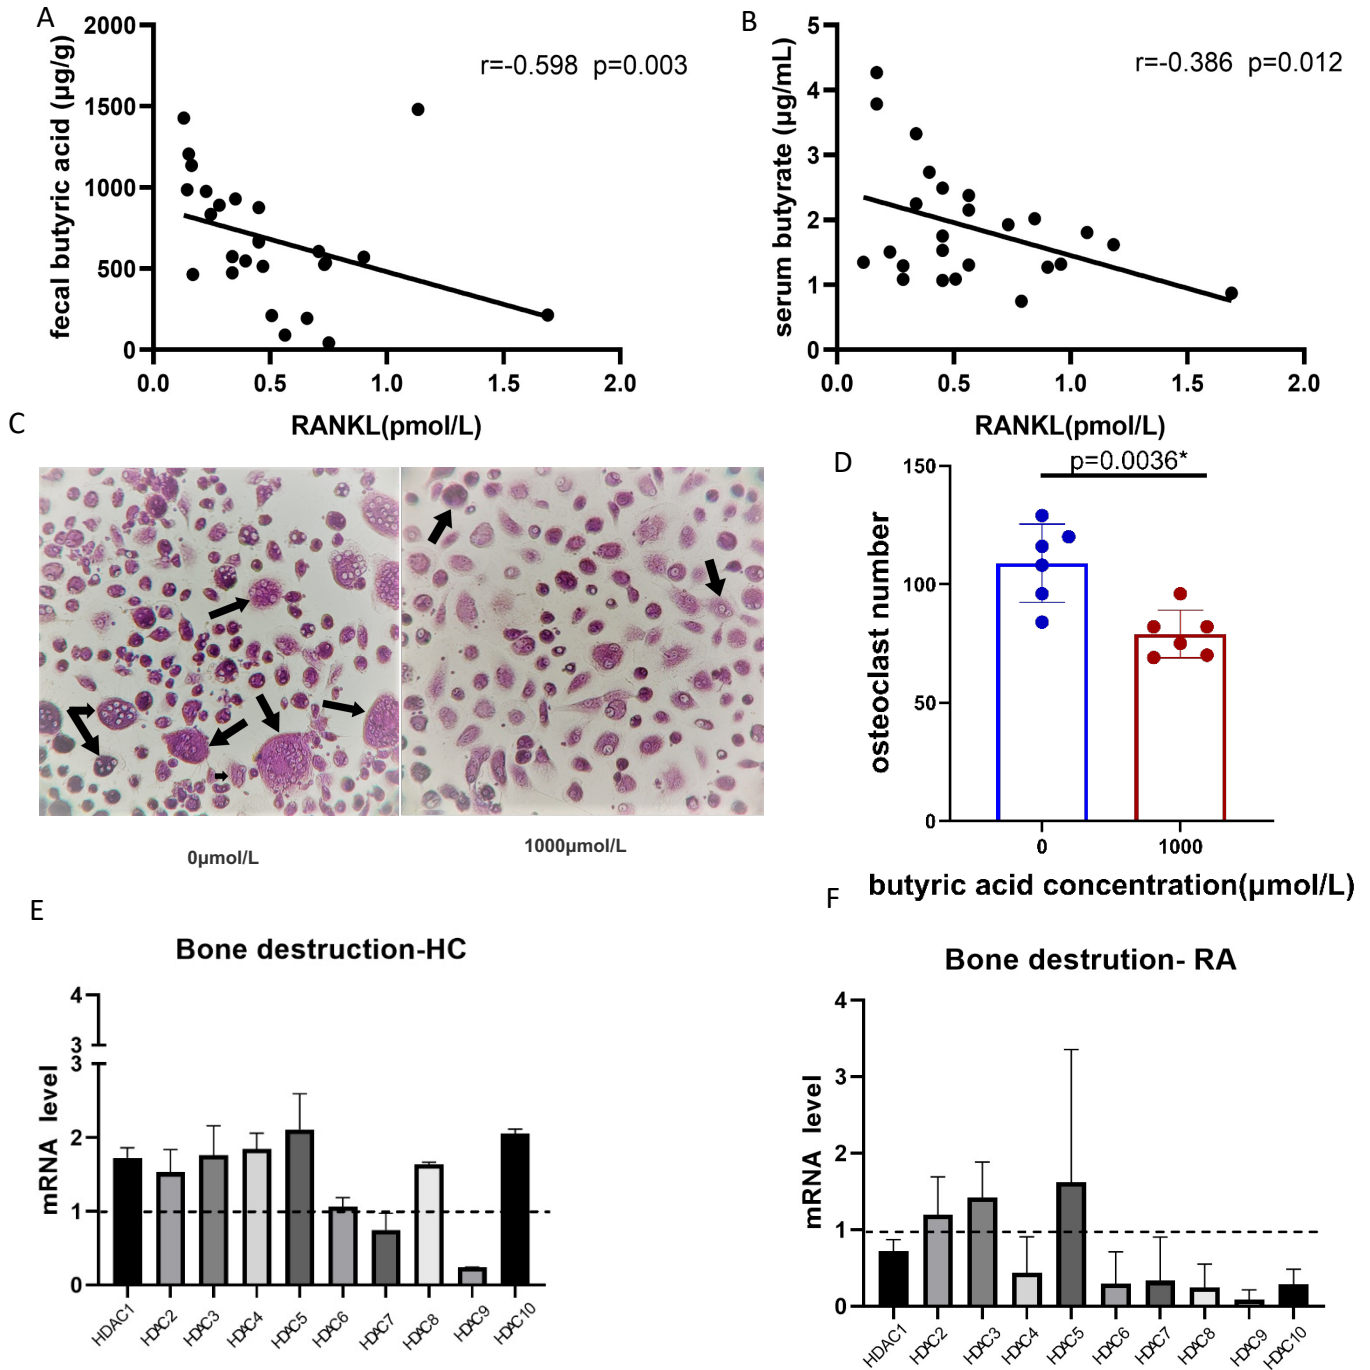

**Fig. S4. Butyrate treatment suppressed osteoclast differentiation.**

**A.** Correlation between fecal butyric acid and the level of serum RANKL in RA patients.

**B.** Correlation between serum butyric acid and the level of serum RANKL in RA patients.

**C.** Tartrate-resistant acid phosphatase (TRAP) staining of mature osteoclasts (OCs) obtained from peripheral blood mononuclear cells (PBMCs) of RA and cultured in the presence of either non-butyrate or butyrate at a concentration of 500  $\mu\text{mol/L}$  (original magnification 200 $\times$ ). The graph represents the comparison of OC (TRAP-positive cells with  $\geq 3$  nuclei) numbers between those cultured with non-butyrate and with 500  $\mu\text{mol/L}$  butyrate.

**D.** Tartrate-resistant acid phosphatase (TRAP) staining of mature osteoclasts (OCs) obtained from peripheral blood mononuclear cells (PBMCs) of RA and cultured in the presence of either no butyrate or butyrate at a concentration of 500  $\mu\text{mol/L}$ .

**E.** The level of messenger RNA (mRNA) of each histone acetylase subtype in osteoclasts of HC patients.

**F.** The level of messenger RNA (mRNA) of each histone acetylase subtype in osteoclasts of RA patients.

Significance between groups tested by Mann-Whitney U test, \*,  $p < 0.05$ . \*\*,  $p < 0.01$ ; \*\*\*,  $p < 0.001$ .

**Fig. S5**

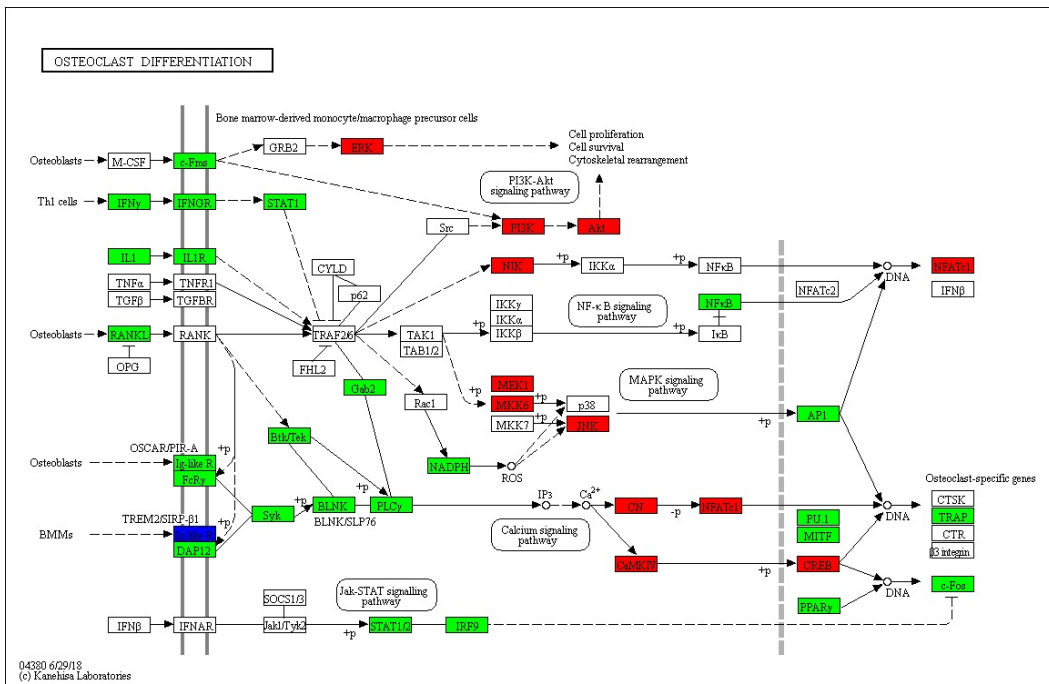

**Fig. S5 Butyrate administration altered the KEGG pathway of osteoclast differentiation.**

The altered genes within the pathway is shown. The coloring scheme is as follows: red are upper-regulated in osteoclast differentiation, green are down-regulated in osteoclast differentiation, blue are unidentified changed gene in osteoclast differentiation.



**Fig. S7**

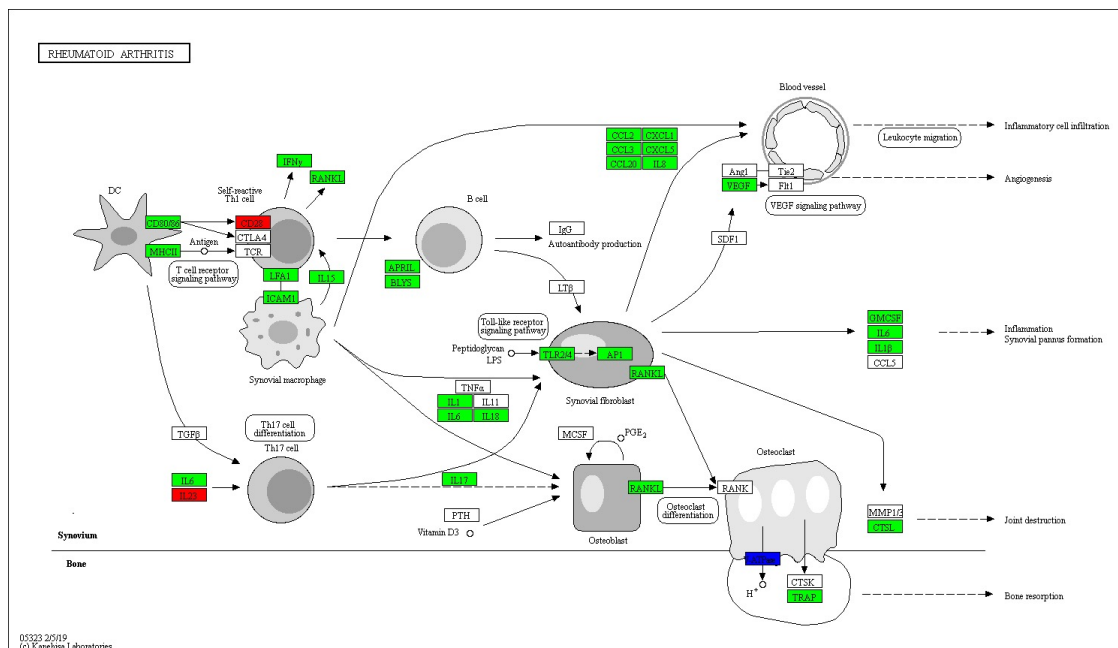

**Fig. S7 Butyrate administration altered the KEGG RA pathway.**

The altered genes within the pathway is shown. The coloring scheme is as follows: red are up-regulated in RA, green are down-regulated in RA, blue are unidentified changed gene in RA.



**Fig. S8**

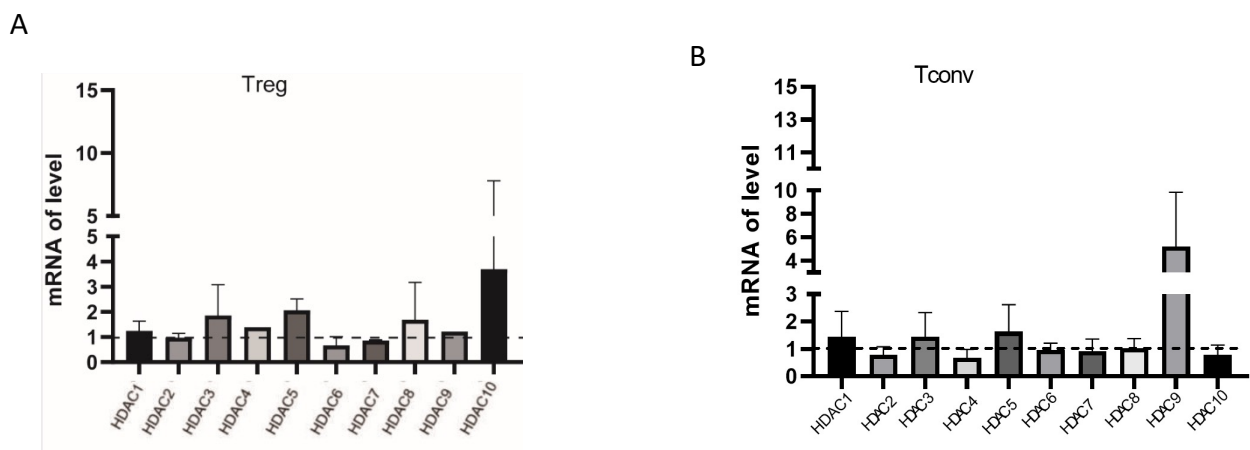

**Fig. S8 Butyrate administration inhibited HDACs in Tregs and Tconv cells.**

A. Expression of mRNA of each histone acetylase subtype measured by real-time PCR in Tregs.

B. Expression of mRNA of each histone acetylase subtype measured by real-time PCR in non-Tregs (Tconvs).

Fig. S9

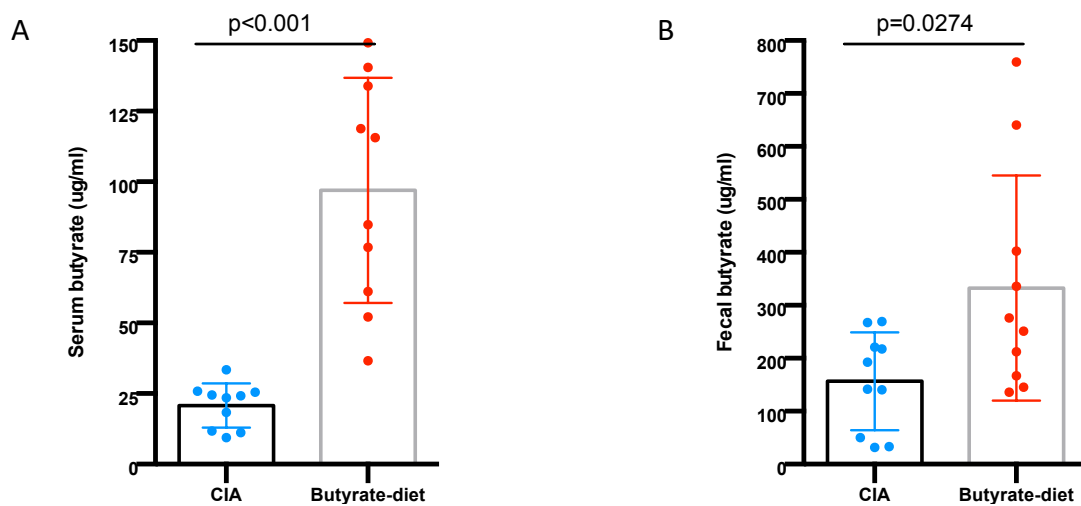

**Fig. S9 Serum and fecal butyrate level after butyrate treatment in CIA mice.**

**A.** Serum levels of butyrate in CIA and butyrate-diet mice. **B.** Fecal butyrate levels of butyrate in CIA and butyrate-diet mice.

**Fig. S10**

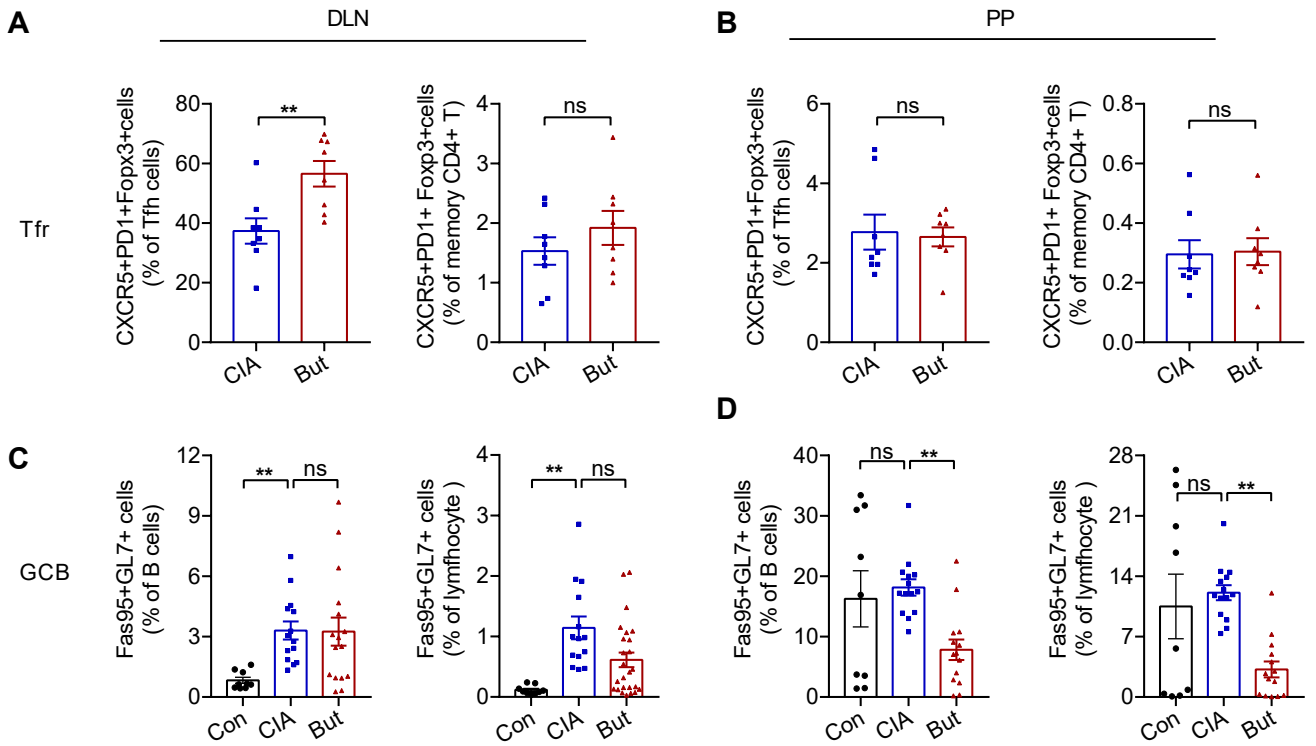

**Fig. S10 Butyrate suppressed immune responses in CIA mice.**

Representative flow cytometry plots with graphs showing the frequency of CD4<sup>+</sup>CD44<sup>+</sup>CXCR5<sup>+</sup>PD1<sup>+</sup>Foxp3<sup>+</sup>Tfr cells (**A** and **B**) and B220<sup>+</sup>CD4<sup>+</sup>Fas95<sup>+</sup>GL7<sup>+</sup>GCB cells (**C** and **D**) in draining lymph nodes (DLN) and Peyer's patches (PP) of the indicated groups.

Con, n=9; CIA, n=8-14; But, n=8-14. Data were pooled from two independent experiments and are here expressed as the mean  $\pm$  SEM. Significance determined using Mann-Whitney U test (e-n).

\*P < 0.05, \*\*P < 0.01.

# Fig. S11

Figure S10

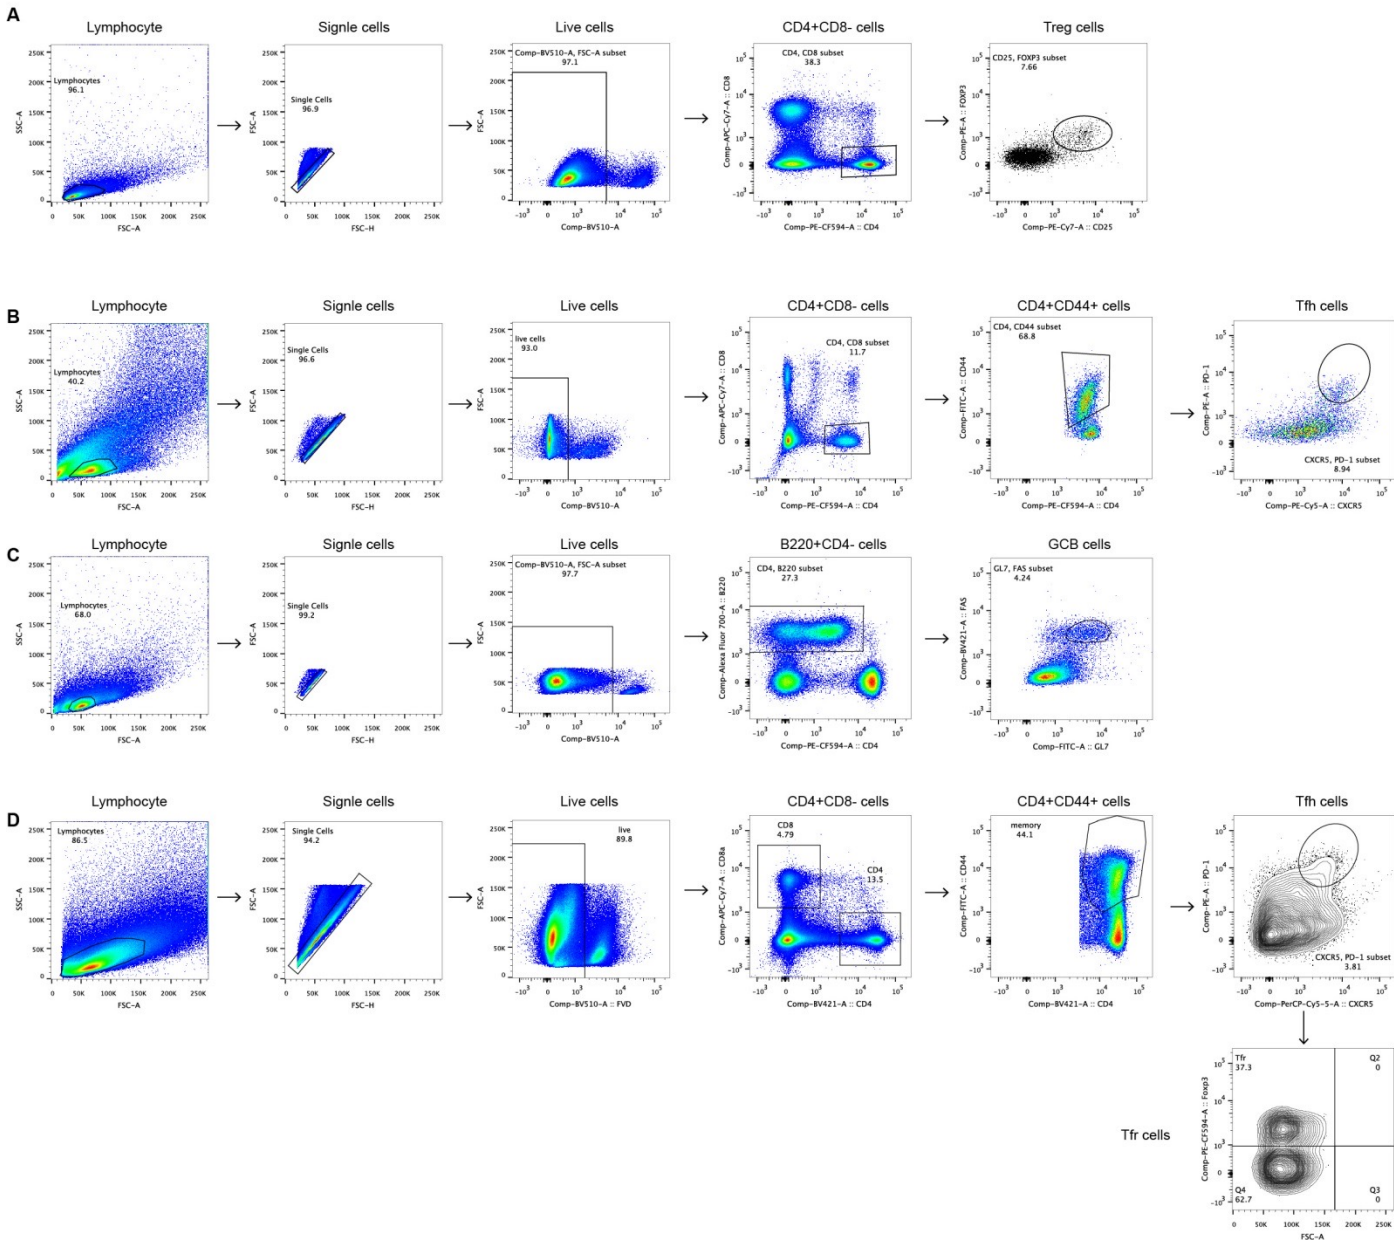

**Fig. S11 Gating strategies of T cells subsets and GC B cells by flow cytometry.**

**Panel A**, Tregs is identified as CD4<sup>+</sup>CD25<sup>+</sup>Foxp3<sup>+</sup> subset. **Panel B**, Tfh cells were determined as CD4<sup>+</sup>CD44<sup>+</sup>CXCR5<sup>+</sup>PD-1<sup>+</sup>Bcl6<sup>+</sup> cells. **Panel C**, Germinal center B was identified as B220<sup>+</sup>CD4<sup>-</sup>CD95<sup>+</sup>GL-7<sup>+</sup>. **Panel D**, Tfr cells were determined as CD4<sup>+</sup>CD44<sup>+</sup>CXCR5<sup>+</sup>PD-1<sup>+</sup>Foxp3<sup>+</sup>.

Th, helper T cells; Tfh, follicular helper T cells; PD-1, programmed cell death 1; CXCR5, C-X-C chemokine receptor type 5.

**Table S1. Demographic and clinical information of the naïve cohort**

| Characteristic                   | HC                  | ACPA (+)          | P      | ACPA (+)          | ACPA (-)          | P<br>ACPA (+) vs<br>ACPA (-) |
|----------------------------------|---------------------|-------------------|--------|-------------------|-------------------|------------------------------|
|                                  | (n=29)              | (n=25)            | value  |                   |                   |                              |
| Age, year, median (range)        | 52 (25, 66)         | 48 (29-68)        | 0.5561 | 48 (29-68)        | 59 (25-79)        | 0.532                        |
| Female/Male                      | 20/9                | 15/10             | 0.501  | 15/10             | 12/3              | 0.201                        |
| BMI, median (range)              | 22.5<br>(19.5,32.7) | 23.7 (19.5, 32.1) | 0.1285 | 23.7 (19.5, 32.1) | 22.1 (18.6, 32.0) | 0.199                        |
| Duration, Months, median (range) | N/A                 | 5 (1-20)          | N/A    | 5 (1-20)          | 7 (1-22)          | 0.532                        |
| Clinical parameters              |                     |                   |        |                   |                   |                              |
| ESR, mm/h, median (range)        | N/A                 | 49 (15, 134)      | N/A    | 49 (15, 134)      | 36 (7, 25)        | 0.016                        |
| CRP, mg/l, median (range)        | N/A                 | 36.2 (1.06, 200)  | N/A    | 36.2 (1.06, 200)  | 5.88 (1.32, 67.5) | 0.082                        |
| DAS28-ESR, median (range)        | N/A                 | 6.3 (3.7, 8.8)    | N/A    | 6.3 (3.7, 8.8)    | 5.2 (1.9, 8.4)    | 0.001                        |
| DAS28-CRP, median (range)        | N/A                 | 5.6 (3.1, 8.3)    | N/A    | 5.6 (3.1, 8.3)    | 4.7 (1.5, 7.8)    | 0.001                        |
| TJC-28, median (range)           | N/A                 | 11 (4, 39)        | N/A    | 11 (4, 39)        | 11 (0, 44)        | 0.034                        |
| SJC-28, median (range)           | N/A                 | 8 (0, 25)         | N/A    | 8 (0, 25)         | 6 (0, 24)         | 0.616                        |
| DJC-28, n (%)                    | N/A                 | 4 (16)            | N/A    | 4 (16)            | 2 (13.3)          | 0.852                        |
| Treatment                        | N/A                 | 0                 | N/A    | 0                 | 0                 | N/A                          |

**Table S2. RA-associated species identified from NORA cohort (Wilcoxon signed-rank test)**

| <b>species</b>                        | <b>Pvalue</b> | <b>HCmean</b> | <b>meanRA</b> | <b>HCmedian</b> | <b>RAmedian</b> | <b>nrichGroup</b> | <b>Qvalue</b> | <b>butyrate-metabolizing</b> |
|---------------------------------------|---------------|---------------|---------------|-----------------|-----------------|-------------------|---------------|------------------------------|
| Citrobacter_braakii                   | 6.71E-18      | 0.0000706     | 3.57E-06      | 0.0000181       | 0               | HC                | 2.68116E-15   |                              |
| Bifidobacterium_adolescentis          | 1.12E-12      | 0.0158298     | 0.000767      | 0.0011529       | 0.0001812       | HC                | 7.45876E-11   |                              |
| Lactobacillus_ruminis                 | 3.35E-10      | 0.0001344     | 0.000021      | 0.0000473       | 0               | HC                | 6.08446E-09   |                              |
| Citrobacter_freundii                  | 5.95E-10      | 0.0022316     | 0.0000756     | 0.0002123       | 0.0000232       | HC                | 1.00895E-08   |                              |
| Clostridium_argentinense              | 4.32E-09      | 6.43E-06      | 7.25E-07      | 0               | 0               | HC                | 5.56829E-08   | producing                    |
| Bifidobacterium_catenuatum            | 2.97E-08      | 0.0003639     | 0.0001552     | 0.0002182       | 0.0000561       | HC                | 3.14771E-07   |                              |
| Clostridium_beijerinckii              | 1.38E-07      | 6.12E-06      | 8.31E-07      | 0               | 0               | HC                | 1.07585E-06   | producing                    |
| Aggregatibacter_actinomycetemcomitans | 4.36E-07      | 5.83E-06      | 5.5E-07       | 0               | 0               | HC                | 2.71084E-06   |                              |
| Bifidobacterium_kashiwanohense        | 4.97E-07      | 0.0016031     | 0.0006142     | 0.0007044       | 0.0001325       | HC                | 3.00429E-06   |                              |
| Desulfosporosinus_orientis            | 6.27E-07      | 5.26E-06      | 7.96E-07      | 0               | 0               | HC                | 3.57835E-06   | consuming                    |
| Myroides_odoratimimus                 | 6.61E-07      | 0.0000179     | 3.12E-06      | 0               | 0               | HC                | 3.71806E-06   |                              |
| Staphylococcus_aureus                 | 6.73E-07      | 9.32E-06      | 1.16E-06      | 0               | 0               | HC                | 3.76641E-06   |                              |
| Lactobacillus_agilis                  | 8.02E-07      | 0.0000111     | 4.51E-06      | 0.0000118       | 0               | HC                | 4.28452E-06   |                              |
| Bacteroides_cellulosilyticus          | 1.08E-06      | 0.0275732     | 0.0162939     | 0.0190555       | 0.0116699       | HC                | 5.39271E-06   |                              |
| Clostridium_cellulosi                 | 1.19E-06      | 0.0275714     | 0.0163143     | 0.0191012       | 0.0116815       | HC                | 5.7938E-06    |                              |
| Citrobacter_werkmanii                 | 1.87E-06      | 0.0000329     | 9.98E-06      | 0.0000106       | 0               | HC                | 8.31458E-06   |                              |
| Campylobacter_jejuni                  | 2.53E-06      | 0.0007703     | 0.000351      | 0.00047         | 0.0002273       | HC                | 1.05813E-05   |                              |
| Pseudomonas_viridiflava               | 2.69E-06      | 0.0000392     | 1.62E-06      | 0               | 0               | HC                | 1.10909E-05   |                              |
| Oceanisphaera_profunda                | 4.77E-06      | 0.0000528     | 2.97E-06      | 0               | 0               | HC                | 1.80126E-05   |                              |
| Brevibacillus_laterosporus            | 4.83E-06      | 8.55E-06      | 1.27E-06      | 0               | 0               | HC                | 1.81984E-05   |                              |
| Serratia_liquefaciens                 | 0.0000064     | 9.26E-06      | 2.96E-06      | 0               | 0               | HC                | 2.31159E-05   |                              |
| Flammeovirgaceae_bacterium_311        | 0.0000106     | 0.0000279     | 5.83E-06      | 0               | 0               | HC                | 3.46921E-05   |                              |
| Thermodesulfovibrio_yellowstonii      | 0.0000133     | 0.0000084     | 0.0000037     | 0               | 0               | HC                | 4.10693E-05   |                              |
| Niastella_koreensis                   | 0.0000139     | 0.0000514     | 4.48E-06      | 0               | 0               | HC                | 4.23978E-05   |                              |
| Pasteurellaceae_bacterium_NI1060      | 0.000015      | 2.01E-06      | 0             | 0               | 0               | HC                | 4.52317E-05   |                              |
| Pseudonocardia_sp.                    | 0.0000161     | 0.0000116     | 3.73E-06      | 0               | 0               | HC                | 4.80018E-05   | consuming                    |
| Bifidobacterium_animalis              | 0.0000166     | 0.0001131     | 0.0000527     | 0.00006         | 0.0000267       | HC                | 4.92404E-05   |                              |
| Seonamhaeicola_sp.                    | 0.0000185     | 0.0000111     | 1.96E-06      | 0               | 0               | HC                | 5.38341E-05   | consuming                    |
| Raoultella_ornithinolytica            | 0.0000258     | 0.0003608     | 0.0000347     | 0.0000307       | 0.0000187       | HC                | 7.02253E-05   |                              |
| Desulfurella_acetivorans              | 0.0000268     | 0.0000354     | 0.0000175     | 0.0000236       | 0.0000124       | HC                | 7.23097E-05   |                              |
| Aerococcus_urinae                     | 0.0000303     | 0.0000121     | 2.99E-06      | 0               | 0               | HC                | 8.0016E-05    |                              |

|                                       |           |           |           |           |           |    |             |           |
|---------------------------------------|-----------|-----------|-----------|-----------|-----------|----|-------------|-----------|
| Rufibacter_sp.                        | 0.0000372 | 4.79E-06  | 6.06E-07  | 0         | 0         | HC | 9.46767E-05 |           |
| Pasteurella_multocida                 | 0.0000585 | 6.51E-06  | 1.92E-06  | 0         | 0         | HC | 0.000136733 |           |
| Pseudorhodoplanes_sinuspersici        | 0.0000613 | 7.24E-06  | 0.0000036 | 0         | 0         | HC | 0.000141756 |           |
| Sphingomonas_panacis                  | 0.0000639 | 3.63E-06  | 8.01E-07  | 0         | 0         | HC | 0.000146326 | consuming |
| Deinococcus_deserti                   | 0.0000656 | 0.000016  | 5.41E-06  | 0         | 0         | HC | 0.000149266 | consuming |
| endosymbiont_TC1_of_Trimyema_compress | 0.0000825 | 0.0000134 | 5.33E-06  | 0         | 0         | HC | 0.000180137 |           |
| Pseudomonas_stutzeri                  | 1.88E-17  | 0.0000834 | 0.0003963 | 0.0000439 | 0.0001953 | RA | 3.75602E-15 | consuming |
| Dehalococcoides_mccartyi              | 2.87E-15  | 3.99E-06  | 0.0002621 | 0         | 0.0000139 | RA | 3.82261E-13 |           |
| Cutibacterium_acnes                   | 1.46E-14  | 0.0001208 | 0.0004039 | 0.0001166 | 0.0002236 | RA | 1.45845E-12 |           |
| Desulfitobacterium_dehalogenans       | 1.1E-12   | 4.96E-06  | 0.0000192 | 0         | 0.0000141 | RA | 7.37001E-11 | consuming |
| Pontibacter_akesuensis                | 1.87E-12  | 0.0000188 | 0.0000415 | 0.0000114 | 0.0000307 | RA | 1.06744E-10 |           |
| Vibrio_furnissii                      | 5.18E-12  | 4.69E-07  | 8.91E-06  | 0         | 0         | RA | 2.35752E-10 |           |
| Methylobacterium_sp.                  | 7.14E-12  | 6.02E-06  | 0.000023  | 0         | 0.000015  | RA | 2.90133E-10 | consuming |
| Bordetella_sp.                        | 7.45E-12  | 0.0000136 | 0.0000576 | 0.0000114 | 0.0000297 | RA | 2.97684E-10 | consuming |
| Delftia_tsuruhatensis                 | 1.38E-11  | 0         | 0.0000103 | 0         | 0         | RA | 5.01287E-10 | consuming |
| Cupriavidus_necator                   | 3.27E-11  | 0.0000088 | 0.0000316 | 0.00001   | 0.0000185 | RA | 1.03796E-09 | consuming |
| Microlunatus_phosphovoros             | 3.76E-11  | 2.35E-06  | 0.0000308 | 0         | 0         | RA | 1.1557E-09  |           |
| Mesorhizobium_loti                    | 6.69E-11  | 7.92E-07  | 0.0000102 | 0         | 0         | RA | 1.74705E-09 | consuming |
| Sulfuricaulis_limicola                | 7.09E-11  | 1.18E-06  | 0.0000164 | 0         | 0         | RA | 1.81426E-09 |           |
| Thalassolituus_oleivorans             | 7.58E-11  | 8.85E-07  | 0.0000076 | 0         | 0         | RA | 1.89299E-09 | consuming |
| Cupriavidus_taiwanensis               | 1.04E-10  | 2.62E-06  | 0.0000207 | 0         | 0         | RA | 2.4236E-09  | consuming |
| Klebsiella_variicola                  | 1.25E-10  | 2.24E-06  | 0.0000354 | 0         | 0         | RA | 2.77483E-09 |           |
| Bartonella_apis                       | 1.74E-10  | 1.53E-06  | 0.000014  | 0         | 0         | RA | 3.53455E-09 |           |
| Pseudomonas_poae                      | 1.98E-10  | 1.58E-06  | 0.0000232 | 0         | 0         | RA | 3.86146E-09 | consuming |
| Clostridium_estertheticum             | 2.13E-10  | 0.0000065 | 0.0000281 | 0         | 0.0000142 | RA | 4.05284E-09 | producing |
| Mycobacterium_kansasii                | 7.06E-10  | 5.16E-07  | 0.0000161 | 0         | 0         | RA | 1.16419E-08 | consuming |
| Paenibacillus_naphthalenovorans       | 9.24E-10  | 3.41E-06  | 0.0000299 | 0         | 0         | RA | 1.44545E-08 | consuming |
| Desulfotomaculum_gibsoniae            | 1E-09     | 1.13E-06  | 0.0000112 | 0         | 0         | RA | 1.53683E-08 |           |
| Gloeomargarita_lithophora             | 1.48E-09  | 2.19E-06  | 0.0000285 | 0         | 0         | RA | 2.19027E-08 |           |
| Streptomyces_davawensis               | 4E-09     | 2.11E-06  | 0.0000305 | 0         | 0         | RA | 5.23189E-08 |           |
| Thermincola_potens                    | 4.12E-09  | 8.67E-06  | 0.0000331 | 0         | 0.0000114 | RA | 5.35919E-08 |           |
| Erwinia_gerundensis                   | 4.24E-09  | 0         | 7.53E-06  | 0         | 0         | RA | 5.48511E-08 |           |
| Bifidobacterium_dentium               | 6.59E-09  | 0.0000687 | 0.000173  | 0.0000518 | 0.0001348 | RA | 8.07952E-08 |           |
| Peptoniphilus_sp.                     | 8.16E-09  | 5.72E-07  | 0.0000255 | 0         | 0         | RA | 9.67761E-08 | producing |

|                                        |          |           |           |           |           |    |             |           |
|----------------------------------------|----------|-----------|-----------|-----------|-----------|----|-------------|-----------|
| Nocardioides_sp.                       | 8.6E-09  | 6.52E-06  | 0.000027  | 0         | 0.000011  | RA | 1.01069E-07 |           |
| Stenotrophomonas_maltophilia           | 1.6E-08  | 0.0003297 | 0.0010163 | 0.0002111 | 0.0004046 | RA | 1.8112E-07  |           |
| Limnohabitans_sp.                      | 3.04E-08 | 1.74E-06  | 0.0000199 | 0         | 0         | RA | 3.21144E-07 | consuming |
| Paenibacillus_stellifer                | 3.14E-08 | 0.0000234 | 0.0000534 | 0.0000191 | 0.0000275 | RA | 3.30176E-07 |           |
| Lactococcus_raffinolactis              | 4.74E-08 | 7.87E-06  | 0.0000263 | 0         | 0.0000131 | RA | 4.73624E-07 |           |
| Actinomyces_gaoshouyii                 | 7.02E-08 | 8.98E-07  | 5.33E-06  | 0         | 0         | RA | 6.5501E-07  |           |
| Pectobacterium_carotovorum             | 7.4E-08  | 7.65E-06  | 0.0000173 | 0         | 0.0000169 | RA | 6.82932E-07 |           |
| Actinomyces_oris                       | 8.27E-08 | 0.0000502 | 0.0000951 | 0.0000319 | 0.0000815 | RA | 7.44619E-07 |           |
| Cronobacter_sakazakii                  | 8.47E-08 | 7.36E-06  | 0.0001553 | 0         | 0.0000144 | RA | 7.58377E-07 |           |
| Geobacter_daltonii                     | 8.6E-08  | 6.18E-06  | 0.0000251 | 0         | 0.0000117 | RA | 7.67238E-07 | consuming |
| Lactobacillus_mucosae                  | 9.28E-08 | 0.0000178 | 0.0002593 | 0         | 0         | RA | 8.12565E-07 |           |
| Arcanobacterium_phocae                 | 9.9E-08  | 3.18E-07  | 3.31E-06  | 0         | 0         | RA | 8.52453E-07 |           |
| Mesorhizobium_ciceri                   | 1.2E-07  | 3.87E-06  | 0.0000104 | 0         | 0         | RA | 9.78235E-07 |           |
| Curvibacter_sp.                        | 1.35E-07 | 4.63E-06  | 0.0000173 | 0         | 0         | RA | 1.06018E-06 |           |
| Candidatus_Desulfovibrio_trichonymphae | 1.42E-07 | 7.13E-06  | 0.0000229 | 0         | 0.0000107 | RA | 1.09639E-06 |           |
| Bifidobacterium_breve                  | 1.43E-07 | 0.0003725 | 0.0006528 | 0.000302  | 0.0005477 | RA | 1.10147E-06 |           |
| Bordetella_bronchialis                 | 1.44E-07 | 4.31E-06  | 0.0000117 | 0         | 0         | RA | 1.10652E-06 | consuming |
| Nocardiopsis_alba                      | 1.66E-07 | 2.91E-06  | 0.0000136 | 0         | 0         | RA | 1.24189E-06 |           |
| Actinomyces_hongkongensis              | 1.88E-07 | 0.0000274 | 0.000063  | 0.0000226 | 0.0000472 | RA | 1.3703E-06  |           |
| Pseudarthrobacter_equi                 | 2.06E-07 | 8.54E-06  | 0.0000274 | 0.0000106 | 0.0000121 | RA | 1.47054E-06 |           |
| Candidatus_Desulforudis_audaxviator    | 2.08E-07 | 1.05E-06  | 5.98E-06  | 0         | 0         | RA | 1.48143E-06 |           |
| Paenibacillus_sabinae                  | 2.22E-07 | 4.81E-06  | 0.0000183 | 0         | 0.0000107 | RA | 1.55624E-06 |           |
| Cyanothece_sp.                         | 2.44E-07 | 6.26E-06  | 0.0000166 | 0         | 0.0000109 | RA | 1.67727E-06 |           |
| Neisseria_zoodegmatis                  | 2.61E-07 | 5.17E-06  | 0.0000144 | 0         | 0.0000127 | RA | 1.76762E-06 |           |
| Gordonibacter_urolithinfaciens         | 3.85E-07 | 0.0001416 | 0.0002818 | 0.0001119 | 0.0002003 | RA | 2.45231E-06 |           |
| Pantoea_sp.                            | 4.27E-07 | 9.28E-06  | 0.0000221 | 0         | 0.0000144 | RA | 2.66612E-06 |           |
| Pseudomonas_extremaustralis            | 4.61E-07 | 0.0000023 | 7.81E-06  | 0         | 0         | RA | 2.83311E-06 |           |
| Deinococcus_puniceus                   | 6.1E-07  | 2.56E-06  | 0.0000123 | 0         | 0         | RA | 3.50696E-06 | consuming |
| Pseudomonas_cremoricolorata            | 6.34E-07 | 1.13E-06  | 6.36E-06  | 0         | 0         | RA | 3.60745E-06 | consuming |
| Halobiforma_lacisalsi                  | 6.44E-07 | 0         | 6.91E-06  | 0         | 0         | RA | 3.64871E-06 |           |
| Azospirillum_brasilense                | 6.9E-07  | 0.000044  | 0.000089  | 0.0000463 | 0.0000704 | RA | 3.83408E-06 | consuming |
| Sphingobium_sp.                        | 6.93E-07 | 0.0000279 | 0.0000574 | 0.0000161 | 0.0000377 | RA | 3.84592E-06 | consuming |
| Pseudomonas_azotoformans               | 7.44E-07 | 4.95E-06  | 0.0000211 | 0         | 0         | RA | 4.0553E-06  | consuming |
| Pseudomonas_fluorescens                | 8.1E-07  | 0.0001325 | 0.000208  | 0.000082  | 0.0001985 | RA | 4.31542E-06 | consuming |



|                                     |           |           |           |           |           |    |             |           |
|-------------------------------------|-----------|-----------|-----------|-----------|-----------|----|-------------|-----------|
| Stenotrophomonas_rhizophila         | 8.98E-07  | 9.22E-06  | 0.0000247 | 0         | 0.0000139 | RA | 4.68205E-06 |           |
| Mogibacterium_pumilum               | 1.01E-06  | 0.0000199 | 0.0000415 | 0.0000132 | 0.0000309 | RA | 5.12662E-06 |           |
| Moraxella_osloensis                 | 1.13E-06  | 0.0000244 | 0.0000504 | 0.0000155 | 0.0000266 | RA | 5.57754E-06 | consuming |
| Devriesea_agamarum                  | 1.14E-06  | 1.32E-06  | 0.0000113 | 0         | 0         | RA | 5.61399E-06 |           |
| Verrucomicrobia_bacterium           | 1.19E-06  | 0.0000116 | 0.0000228 | 0         | 0.0000131 | RA | 5.7938E-06  |           |
| Sphingomonas_sp.                    | 1.24E-06  | 0.0000256 | 0.0000405 | 0.0000157 | 0.0000342 | RA | 5.96957E-06 | consuming |
| Pseudopropionibacterium_propionicum | 1.36E-06  | 0.0000386 | 0.000075  | 0.0000281 | 0.0000344 | RA | 6.39322E-06 |           |
| Actinoplanes_derwentensis           | 1.38E-06  | 5.64E-06  | 0.0000218 | 0         | 0         | RA | 6.4619E-06  | producing |
| Thermus_sp.                         | 1.42E-06  | 5.74E-06  | 0.0000155 | 0         | 0.0000111 | RA | 6.59765E-06 | consuming |
| Zymomonas_mobilis                   | 1.54E-06  | 3.63E-06  | 0.0000151 | 0         | 0         | RA | 7.07042E-06 |           |
| Zobellia_galactanivorans            | 1.97E-06  | 0.0000107 | 0.000021  | 0         | 0.0000206 | RA | 8.67624E-06 |           |
| Phaeobacter_piscinae                | 2.26E-06  | 1.96E-06  | 7.67E-06  | 0         | 0         | RA | 9.68735E-06 | consuming |
| Acidovorax_ebreus                   | 2.31E-06  | 5.33E-07  | 4.02E-06  | 0         | 0         | RA | 9.85624E-06 |           |
| Streptomyces_sp.                    | 2.34E-06  | 0.0000533 | 0.0001008 | 0.0000361 | 0.0000572 | RA | 9.95683E-06 |           |
| Methylobacterium_phyllosphaerae     | 2.36E-06  | 0         | 5.38E-06  | 0         | 0         | RA | 1.00236E-05 |           |
| Paenibacillus_donghaensis           | 2.56E-06  | 0.0000185 | 0.0000421 | 0.0000146 | 0.0000187 | RA | 1.0678E-05  |           |
| Pseudomonas_sp.                     | 0.0000027 | 0.0001024 | 0.0001531 | 0.0000914 | 0.0001296 | RA | 1.11222E-05 | consuming |
| Aeribacillus_pallidus               | 3.07E-06  | 0         | 4.47E-06  | 0         | 0         | RA | 1.24097E-05 |           |
| Candidatus_Aquiluna                 | 3.29E-06  | 3.41E-06  | 8.92E-06  | 0         | 0         | RA | 1.31526E-05 |           |
| Geoalkalibacter_subterraneus        | 0.0000033 | 0.0000497 | 0.0000881 | 0.0000381 | 0.000057  | RA | 1.3186E-05  |           |
| Chryseobacterium_indologenes        | 0.0000039 | 8.57E-06  | 0.0000153 | 0.000011  | 0.0000147 | RA | 1.52223E-05 |           |
| Stenotrophomonas_sp.                | 4.11E-06  | 0.0000305 | 0.0000804 | 0.0000255 | 0.0000312 | RA | 1.59128E-05 |           |
| Pseudomonas_psychrophila            | 4.21E-06  | 0.0000122 | 0.0000223 | 0         | 0.0000181 | RA | 1.62378E-05 |           |
| Meiothermus_ruber                   | 0.0000045 | 9.75E-06  | 0.0000395 | 0         | 0         | RA | 1.71663E-05 | consuming |
| Nitrospira_defluvii                 | 5.07E-06  | 0.0000066 | 0.0000275 | 0         | 0         | RA | 1.89332E-05 |           |
| Deinococcus_soli_Cha_et_al._2016    | 7.82E-06  | 6.44E-06  | 0.0000159 | 0         | 0         | RA | 2.7289E-05  |           |
| Janthinobacterium_svalbardensis     | 0.000008  | 7.23E-06  | 0.0000137 | 0         | 0.0000144 | RA | 2.77979E-05 |           |
| Mannheimia_haemolytica              | 8.08E-06  | 0         | 2.04E-06  | 0         | 0         | RA | 2.80227E-05 |           |
| Adlercreutzia_equolifaciens         | 8.39E-06  | 0.0020032 | 0.0038359 | 0.0004119 | 0.0015642 | RA | 2.88858E-05 |           |
| Vibrio_vulnificus                   | 8.83E-06  | 4.24E-06  | 0.000015  | 0         | 0         | RA | 3.00894E-05 |           |
| Gemmata_sp.                         | 9.09E-06  | 3.22E-06  | 8.51E-06  | 0         | 0         | RA | 3.07891E-05 |           |
| Atopobium_parvulum                  | 9.45E-06  | 0.0000228 | 0.0000535 | 0.0000177 | 0.0000243 | RA | 3.17442E-05 |           |
| Microbacterium_chocolatum           | 9.56E-06  | 1.27E-06  | 6.26E-06  | 0         | 0         | RA | 3.20328E-05 |           |
| Pseudomonas_brenneri                | 9.74E-06  | 0.0000191 | 0.0000323 | 0.0000115 | 0.0000321 | RA | 3.25021E-05 |           |

|                                          |           |           |           |           |           |    |             |           |
|------------------------------------------|-----------|-----------|-----------|-----------|-----------|----|-------------|-----------|
| <i>Corynebacterium_variabile</i>         | 9.95E-06  | 8.25E-06  | 0.0000157 | 0         | 0.0000126 | RA | 3.30447E-05 | consuming |
| <i>Rhodoferax_sp.</i>                    | 0.0000101 | 8.21E-06  | 0.0000138 | 0         | 0.0000118 | RA | 3.34292E-05 | consuming |
| <i>Rhodococcus_hoagii</i>                | 0.0000106 | 6.08E-06  | 0.0000145 | 0         | 0         | RA | 3.46921E-05 |           |
| <i>Pseudomonas_chlororaphis</i>          | 0.0000109 | 2.21E-06  | 7.73E-06  | 0         | 0         | RA | 3.54363E-05 | consuming |
| <i>Pseudomonas_antarctica</i>            | 0.0000114 | 4.63E-06  | 9.05E-06  | 0         | 0.0000118 | RA | 3.6655E-05  | consuming |
| <i>Kitasatospora_aureofaciens</i>        | 0.0000114 | 9.03E-06  | 0.0000208 | 0         | 0.0000133 | RA | 3.6655E-05  | consuming |
| <i>Denitrovibrio_acetiphilus</i>         | 0.0000122 | 3.02E-06  | 0.0000129 | 0         | 0         | RA | 3.85501E-05 |           |
| <i>Terriglobus_roseus</i>                | 0.0000123 | 0.0000247 | 0.0000517 | 0.0000156 | 0.0000179 | RA | 3.87824E-05 |           |
| <i>Pseudomonas_trivialis</i>             | 0.0000124 | 1.85E-06  | 6.23E-06  | 0         | 0         | RA | 3.90137E-05 | consuming |
| <i>Spirosoma_aerolatum</i>               | 0.0000131 | 4.22E-06  | 0.000011  | 0         | 0         | RA | 4.06191E-05 |           |
| <i>Burkholderia_multivorans</i>          | 0.0000139 | 4.92E-06  | 0.0000173 | 0         | 0         | RA | 4.23978E-05 | consuming |
| <i>Halomonas_sp.</i>                     | 0.000018  | 9.93E-06  | 0.0000308 | 0         | 0.0000107 | RA | 5.26422E-05 |           |
| <i>Halomonas_aestuarii</i>               | 0.000019  | 0.0000657 | 0.0001165 | 0.0000487 | 0.0000722 | RA | 5.50141E-05 |           |
| <i>Stenotrophomonas_acidaminiphila</i>   | 0.000019  | 1.75E-06  | 0.0000054 | 0         | 0         | RA | 5.50141E-05 |           |
| <i>Fibrella_aestuarina</i>               | 0.0000201 | 0.0000242 | 0.0000558 | 0.0000244 | 0.0000337 | RA | 5.76049E-05 |           |
| <i>Corynebacterium_aurimucosum</i>       | 0.0000232 | 0.0000199 | 0.0000494 | 0.0000163 | 0.0000152 | RA | 6.46296E-05 |           |
| <i>Chloroherpeton_thalassium</i>         | 0.0000242 | 5.45E-06  | 0.0000195 | 0         | 0         | RA | 6.68126E-05 |           |
| <i>Magnetospirillum_gryphiswaldense</i>  | 0.0000248 | 0.0000137 | 0.00003   | 0         | 0.000019  | RA | 6.81037E-05 | consuming |
| <i>Thauera_sp.</i>                       | 0.0000252 | 0.0000238 | 0.0000557 | 0.0000183 | 0.0000335 | RA | 6.89568E-05 |           |
| <i>Alcaligenes_faecalis</i>              | 0.0000253 | 0.0000157 | 0.0000243 | 0.0000117 | 0.0000247 | RA | 6.91692E-05 | consuming |
| <i>Actinomyces_meyeri</i>                | 0.0000259 | 0.0000293 | 0.0000698 | 0.0000172 | 0.0000222 | RA | 7.04354E-05 |           |
| <i>Rhodoferax_antarcticus</i>            | 0.0000261 | 0.0000223 | 0.0000474 | 0.0000143 | 0.0000268 | RA | 7.08544E-05 | consuming |
| <i>Paenibacillaceae_bacterium_GAS479</i> | 0.0000275 | 8.62E-06  | 0.0000224 | 0         | 0.0000127 | RA | 7.37473E-05 |           |
| <i>Cupriavidus_pinatubonensis</i>        | 0.0000307 | 2.13E-06  | 5.71E-06  | 0         | 0         | RA | 8.08959E-05 | consuming |
| <i>Deinococcus_proteolyticus</i>         | 0.0000321 | 0.0000246 | 0.0000515 | 0.0000224 | 0.0000269 | RA | 8.39458E-05 | consuming |
| <i>Rubrivivax_gelatinosus</i>            | 0.0000332 | 9.67E-06  | 0.000025  | 0.0000101 | 0.0000156 | RA | 8.631E-05   | consuming |
| <i>Vitreoscilla_filiformis</i>           | 0.0000337 | 9.34E-07  | 4.79E-06  | 0         | 0         | RA | 8.73754E-05 |           |
| <i>Agarilytica_rhodophyticola</i>        | 0.0000368 | 1.55E-06  | 7.06E-06  | 0         | 0         | RA | 9.38558E-05 |           |
| <i>Verrucomicrobium_spinosum</i>         | 0.0000371 | 0.0000219 | 0.000038  | 0.0000104 | 0.0000195 | RA | 9.44718E-05 |           |
| <i>Cryptobacterium_curtum</i>            | 0.0000423 | 4.37E-07  | 3.63E-06  | 0         | 0         | RA | 0.000105413 |           |
| <i>Bacillus_thuringiensis</i>            | 0.0000426 | 7.55E-07  | 2.61E-06  | 0         | 0         | RA | 0.000106031 |           |
| <i>Streptomyces_puniciscabiei</i>        | 0.0000438 | 9.66E-07  | 6.38E-06  | 0         | 0         | RA | 0.000108486 |           |
| <i>Leuconostoc_citreum</i>               | 0.0000448 | 1.98E-06  | 0.0000646 | 0         | 0         | RA | 0.000110514 |           |
| <i>Pseudomonas_putida</i>                | 0.000045  | 0.0000305 | 0.0000476 | 0.0000226 | 0.0000375 | RA | 0.000110918 | consuming |

|                                |           |           |           |           |           |    |             |           |
|--------------------------------|-----------|-----------|-----------|-----------|-----------|----|-------------|-----------|
| Achromobacter_xylosoxidans     | 0.0000478 | 0.0004217 | 0.0008517 | 0.0002662 | 0.000434  | RA | 0.000116501 | consuming |
| Bordetella_genomosp._13        | 0.000057  | 5.09E-06  | 0.0000108 | 0         | 0         | RA | 0.000133997 |           |
| Cronobacter_turicensis         | 0.00006   | 9.88E-06  | 0.0000279 | 0         | 0         | RA | 0.000139437 |           |
| Brevundimonas_naejangsanensis  | 0.0000614 | 6.96E-06  | 0.0000154 | 0         | 0.0000106 | RA | 0.000141934 | consuming |
| Paenibacillus_graminis         | 0.0000618 | 3.68E-07  | 2.27E-06  | 0         | 0         | RA | 0.000142642 |           |
| Lactococcus_piscium            | 0.0000629 | 0.0000414 | 0.0000978 | 0.0000239 | 0.0000393 | RA | 0.000144579 |           |
| Pandoraea_pulmonicola          | 0.0000633 | 2.71E-06  | 0.0000081 | 0         | 0         | RA | 0.00014528  | consuming |
| Bradyrhizobium_sp.             | 0.0000635 | 0.000021  | 0.0000481 | 0         | 0.0000223 | RA | 0.000145629 |           |
| Brochothrix_thermosphacta      | 0.0000638 | 4.29E-06  | 0.0000103 | 0         | 0         | RA | 0.000146152 |           |
| Desulfovibrio_desulfuricans    | 0.0000662 | 0.0000195 | 0.0000427 | 0.0000124 | 0.0000224 | RA | 0.000150295 |           |
| Propionimicrobium_sp.          | 0.0000698 | 0.0000292 | 0.0000626 | 0.0000184 | 0.0000268 | RA | 0.000156802 |           |
| Streptococcus_anginosus        | 0.0000719 | 0.0013065 | 0.0022607 | 0.0011089 | 0.0013505 | RA | 0.000160535 |           |
| Variovorax_paradoxus           | 0.0000729 | 0.0000161 | 0.0000329 | 0.0000116 | 0.0000147 | RA | 0.000162297 | consuming |
| Parascardovia_denticolens      | 0.0000739 | 0.0000105 | 0.0000283 | 0         | 0.0000134 | RA | 0.000164048 |           |
| Pseudomonas_synxantha          | 0.0000801 | 0.0000111 | 0.0000179 | 0         | 0.0000139 | RA | 0.0001757   | consuming |
| Brevibacterium_sandarakinum    | 0.0000815 | 0.0000078 | 0.0000258 | 0         | 0         | RA | 0.000178293 |           |
| Serratia_sp.                   | 0.0000864 | 0.0000555 | 0.0001204 | 0.0000357 | 0.0000491 | RA | 0.000187454 |           |
| Desulfobacterium_autotrophicum | 0.0000892 | 2.17E-06  | 5.32E-06  | 0         | 0         | RA | 0.00019265  |           |
| Desulfococcus_oleovorans       | 0.0000925 | 0.0000122 | 0.0000303 | 0.0000114 | 0.0000126 | RA | 0.000198714 |           |

**Table S3. List of butyrate producing and consuming species in this study**

| <b>Butyrate-producing species</b> | <b>Butyrate-consuming species</b> |
|-----------------------------------|-----------------------------------|
| Acetobacterium_woodii             | Achromobacter_denitrificans       |
| Acetoanaerobium_sticklandii       | Achromobacter_insolitus           |
| Acidaminococcus_fermentans        | Achromobacter_sp.                 |
| Acidaminococcus_intestini         | Achromobacter_xylooxidans         |
| Actinoplanes_derwentensis         | Alcaligenes_faecalis              |
| Actinoplanes_missouriensis        | Alicyclophilus_denitrificans      |
| Actinoplanes_sp.                  | Bordetella_bronchialis            |
| Alistipes_finegoldii              | Bordetella_hinzii                 |
| Alistipes_shahii                  | Bordetella_holmesii               |
| Alkaliphilus_metalliredigens      | Bordetella_petrii                 |
| Alkaliphilus_oremlandii           | Bordetella_pseudohinzii           |
| Anaerococcus_mediterraneensis     | Bordetella_sp.                    |
| Anaerococcus_prevotii             | Brevundimonas_diminuta            |
| Anaeromyxobacter_dehalogenans     | Brevundimonas_naejangsanensis     |
| Anaeromyxobacter_sp.              | Brevundimonas_sp.                 |
| Anaerostipes_hadrus               | Brevundimonas_subvibrioides       |
| Anaerotignum_propionicum          | Brevundimonas-vesicularis         |
| Blautia_hansenii                  | Burkholderia_cenocepacia          |
| Blautia_sp.                       | Burkholderia_gladioli             |
| Brachyspira_pilosicoli            | Burkholderia_lata                 |
| Butyrivibrio_hungatei             | Burkholderia_metallica            |
| Butyrivibrio_proteoclasticus      | Burkholderia_multivorans          |
| Clostridium_acetobutylicum        | Burkholderia_oklahomensis         |
| Clostridium_argentinense          | Burkholderia_sp.                  |
| Clostridium_baratii               | Castellaniella_defragrans         |
| Clostridium_beijerinckii          | Comamonas_kerstensii              |
| Clostridium_bornimense            | Comamonas_serinivorans            |
| Clostridium_botulinum             | Comamonas_testosteroni            |
| Clostridium_butyricum             | Cupriavidus_gilardii              |
| Clostridium_carboxidivorans       | Cupriavidus_metallidurans         |

|                                      |                             |
|--------------------------------------|-----------------------------|
| Clostridium_cellulosi                | Cupriavidus_necator         |
| Clostridium_cellulovorans            | Cupriavidus_pinatubonensis  |
| Clostridium_chauvoei                 | Cupriavidus_taiwanensis     |
| Clostridium_cochlearium              | Delftia_acidovorans         |
| Clostridium_estertheticum            | Delftia_sp.                 |
| Clostridium_formicaceticum           | Delftia_tsuruhatensis       |
| Clostridium_kluyveri                 | Flavobacterium_columnare    |
| Clostridium_pasteurianum             | Hydrogenophaga_sp.          |
| Clostridium_perfringens              | Limnohabitans_sp.           |
| Clostridium_saccharobutylicum        | Paraburkholderia_caribensis |
| Clostridium_saccharoperbutylaceticum | Paraburkholderia_phymatum   |
| Clostridium_sp.                      | Paraburkholderia_sp.        |
| Clostridium_taeniosporum             | Paraburkholderia_sprentiae  |
| Clostridium_tetani                   | Paraburkholderia_xenovorans |
| Clostridium_tyrobutyricum            | Polaribacter_sp.            |
| Eubacterium_limosum                  | Pseudomonas_aeruginosa      |
| Faecalibaculum_rodentium             | Pseudomonas_alcaligenes     |
| Filifactor_alocis                    | Pseudomonas_antarctica      |
| Flavonifractor_plautii               | Pseudomonas_azotoformans    |
| Fusobacterium_nucleatum              | Pseudomonas_brassicacearum  |
| Fusobacterium_varium                 | Pseudomonas_chlororaphis    |
| Megasphaera_elsdenii                 | Pseudomonas_cichorii        |
| Odoribacter_splanchnicus             | Pseudomonas_citronellolis   |
| Oscillibacter_valericigenes          | Pseudomonas_cremoricolorata |
| Peptoniphilus_sp.                    | Pseudomonas_fluorescens     |
| Porphyromonas_asaccharolytica        | Pseudomonas_fragi           |
| Porphyromonas_gingivalis             | Pseudomonas_knackmussii     |
| Roseburia_hominis                    | Pseudomonas_koreensis       |
| Ruminococcus_albus                   | Pseudomonas_mendocina       |
| Ruminococcus_bicirculans             | Pseudomonas_parafulva       |
| Ruminococcus_champanellensis         | Pseudomonas_poeae           |
| Salinispora_tropica                  | Pseudomonas_psychrotolerans |
| Thermoanaerobacterium_thermosaccharo | Pseudomonas_putida          |
| Thermotoga_profunda                  | Pseudomonas_resinovorans    |

Intestinimonas\_butyriciproducens  
Clostridioides\_difficile  
Ruminococcaceae\_bacterium\_CPB6  
Flavobacteriaceae\_bacterium\_UJ101  
Peptoclostridium\_acidaminophilum  
Clostridium\_novyi

Pseudomonas\_sp.  
Pseudomonas\_stutzeri  
Pseudomonas\_synxantha  
Pseudomonas\_syringae  
Pseudomonas\_trivialis  
Pseudomonas\_veronii  
Pseudomonas\_versuta  
Ralstonia\_insidiosa  
Ralstonia\_mannitolilytica  
Ralstonia\_pickettii  
Ralstonia\_solanacearum  
Ramlibacter\_tataouinensis  
Rhodoferax\_antarcticus  
Rhodoferax\_ferrireducens  
Rhodoferax\_saidenbachensis  
Rhodoferax\_sp.  
Roseomonas\_gilardii  
Sphingomonas\_panacis  
Sphingomonas\_sp.  
Sphingomonas\_taxi  
Tenacibaculum\_dicentrarchi  
Tenacibaculum\_jejuense  
Variovorax\_boronicumulans  
Variovorax\_paradoxus  
Variovorax\_sp.  
Deinococcus\_puniceus  
Desulfosporosinus\_meridiei  
Gramella\_flava  
Pseudomonas\_pseudoalcaligenes  
Sphingobium\_sp.  
Acidovorax\_sp.  
Acinetobacter\_sp.  
Altererythrobacter\_epoxidivorans  
Amycolatopsis\_mediterranei

Aquaspirillum\_sp.  
Archangium\_gephyra  
Aromatoleum\_aromaticum  
Arthrobacter\_alpinus  
Azoarcus\_sp.  
Azospirillum\_brasilense  
Azospirillum\_lipoferum  
Bacillus\_sp.  
Bradyrhizobium\_oligotrophicum  
Brevibacterium\_linens  
Candidatus\_Promineofilum\_breve  
Catenulispora\_acidiphila  
Celeribacter\_indicus  
Chloracidobacterium\_thermophilum  
Chondromyces\_crocatus  
Collimonas\_pratensis  
Corallococcus\_coralloides  
Corynebacterium\_sphenisci  
Corynebacterium\_terpenotabidum  
Corynebacterium\_variabile  
Croceibacter\_atlanticus  
Deinococcus\_deserti  
Deinococcus\_geothermalis  
Deinococcus\_proteolyticus  
Deinococcus\_swuensis  
Desulfarculus\_baarsii  
Desulfitobacterium\_dehalogenans  
Desulfitobacterium\_dichloroeliminans  
Desulfitobacterium\_hafniense  
Desulfobulbus\_propionicus  
Desulfococcus\_multivorans  
Desulfomonile\_tiedjei  
Desulfosporosinus\_acidiphilus  
Desulfosporosinus\_orientis

Desulfuripirillum\_indicum  
Desulfuromonas\_soudanensis  
Dokdonia\_donghaensis  
Erythrobacter\_flavus  
Geobacter\_daltonii  
Geobacter\_sp.  
Gordonia\_sp.  
Heliobacterium\_modesticaldum  
Hyphomicrobium\_denitrificans  
Ilumatobacter\_coccineus  
Janthinobacterium\_sp.  
Kitasatospora\_aureofaciens  
Kocuria\_palustris  
Legionella\_pneumophila  
Magnetospirillum\_gryphiswaldense  
Marinobacter\_salarius  
Meiothermus\_ruber  
Mesorhizobium\_loti  
Methylobacterium\_sp.  
Microbacterium\_aurum  
Microbacterium\_sp.  
Moraxella\_osloensis  
Mycobacterium\_kansasii  
Myxococcus\_fulvus  
Nitrospirillum\_amazonense  
Nonomurea\_sp.  
Novosphingobium\_aromaticivorans  
Paenibacillus\_naphthalenovorans  
Pandoraea\_norimbergensis  
Pandoraea\_pulmonicola  
Paracoccus\_denitrificans  
Pelosinus\_fermentans  
Phaeobacter\_piscinae  
Polaromonas\_sp.



Pseudonocardia\_sp.  
Rhizobium\_sp.  
Rhodopseudomonas\_palustris  
Rhodothermus\_marinus  
Rubrivivax\_gelatinosus  
Rubrobacter\_xylanophilus  
Seonamhaeicola\_sp.  
Sinorhizobium\_fredii  
Sphingopyxis\_macrogoltabida  
Stackebrandtia\_nassauensis  
Streptomyces\_lincolnensis  
Streptosporangium\_roseum  
Sulfitobacter\_pseudonitzschiae  
Thalassolituus\_oleivorans  
Thermaerobacter\_marianensis  
Thermus\_sp.  
Thiomonas\_intermedia  
Treponema\_sp.  
Vulgatibacter\_incomptus

---

**Table S4. RA-associated species identified from the NORA cohort ( K-S test)**

| <b>Differential_Species</b>   | <b>KS_Pvalue</b> | <b>Enrich_Group</b> | <b>Butyrate-metabolizing</b> |
|-------------------------------|------------------|---------------------|------------------------------|
| Aerococcus_urinae             | 8.52651E-05      | HC                  |                              |
| Citrobacter_braakii           | 2.93729E-10      | HC                  |                              |
| Citrobacter_werkmanii         | 5.12303E-05      | HC                  |                              |
| Clostridium_argentinense      | 3.03962E-05      | HC                  | producing                    |
| Clostridium_saccharobutylicum | 3.03962E-05      | HC                  | producing                    |
| Desulfovibrio_magneticus      | 8.52651E-05      | HC                  |                              |
| Ensifer_adhaerens             | 5.53236E-07      | HC                  |                              |
| Gluconobacter_oxydans         | 8.52651E-05      | HC                  |                              |
| Hafnia_alvei                  | 1.01826E-06      | HC                  |                              |
| Lactobacillus_agilis          | 1.01826E-06      | HC                  |                              |
| Lactobacillus_reuteri         | 3.32172E-06      | HC                  |                              |
| Lactobacillus_ruminis         | 2.8844E-11       | HC                  |                              |
| Melioribacter_roseus          | 5.53236E-07      | HC                  |                              |
| Micromonospora_coxensis       | 5.53236E-07      | HC                  |                              |
| Myroides_odoratimimus         | 1.57263E-07      | HC                  |                              |
| Opitutaceae_bacterium_TAV5    | 3.03962E-05      | HC                  |                              |
| Pasteurella_multocida         | 5.88737E-06      | HC                  |                              |
| Pseudonocardia_sp.            | 5.53236E-07      | HC                  | consuming                    |
| Saccharomonospora_viridis     | 1.03043E-05      | HC                  |                              |
| Serratia_liquefaciens         | 1.78094E-05      | HC                  |                              |
| uncultured_crAssphage         | 5.12303E-05      | HC                  |                              |
| Bordetella_bronchialis        | 5.12303E-05      | RA                  | consuming                    |
| Brevundimonas_naejangsanensis | 1.78094E-05      | RA                  | consuming                    |
| Burkholderia_multivorans      | 5.12303E-05      | RA                  | consuming                    |
| Cronobacter_sakazakii         | 1.29587E-09      | RA                  |                              |
| Cupriavidus_taiwanensis       | 5.88737E-06      | RA                  | consuming                    |
| Dehalococcoides_mccartyi      | 1.09272E-08      | RA                  |                              |
| Deinococcus_proteolyticus     | 4.25103E-08      | RA                  | consuming                    |
| Delftia_tsuruhatensis         | 2.93729E-10      | RA                  | consuming                    |
| Erwinia_gerundensis           | 5.88737E-06      | RA                  |                              |

|                                        |             |    |           |
|----------------------------------------|-------------|----|-----------|
| <i>Kitasatospora_aureofaciens</i>      | 1.29587E-09 | RA | consuming |
| <i>Klebsiella_aerogenes</i>            | 3.32172E-06 | RA |           |
| <i>Klebsiella_variicola</i>            | 8.52651E-05 | RA |           |
| <i>Lactobacillus_mucosae</i>           | 1.85072E-06 | RA |           |
| <i>Mesorhizobium_lotii</i>             | 1.78094E-05 | RA | consuming |
| <i>Methylobacterium_populi</i>         | 5.12303E-05 | RA |           |
| <i>Methylobacterium_sp.</i>            | 2.96825E-07 | RA | consuming |
| <i>Mycobacterium_kansasii</i>          | 1.03043E-05 | RA | consuming |
| <i>Paenibacillus_naphthalenovorans</i> | 8.52651E-05 | RA | consuming |
| <i>Pantoea_sp.</i>                     | 5.88737E-06 | RA |           |
| <i>Pantoea_vagans</i>                  | 1.03043E-05 | RA |           |
| <i>Pectobacterium_carotovorum</i>      | 6.33116E-11 | RA |           |
| <i>Polaribacter_sp.</i>                | 5.12303E-05 | RA | consuming |
| <i>Pontibacter_akesuensis</i>          | 1.09272E-08 | RA |           |
| <i>Pseudomonas_antarctica</i>          | 2.67099E-09 | RA | consuming |
| <i>Pseudomonas_azotoformans</i>        | 1.03043E-05 | RA | consuming |
| <i>Pseudomonas_cremoricolorata</i>     | 8.52651E-05 | RA | consuming |
| <i>Pseudomonas_poae</i>                | 1.85072E-06 | RA | consuming |
| <i>Pseudomonas_psychrophila</i>        | 1.85072E-06 | RA |           |
| <i>Pseudomonas_synxantha</i>           | 8.52651E-05 | RA | consuming |
| <i>Spirosoma_aerolatum</i>             | 8.22796E-08 | RA |           |
| <i>Streptococcus_cristatus</i>         | 3.03962E-05 | RA |           |
| <i>Streptococcus_pneumoniae</i>        | 3.32172E-06 | RA |           |
| <i>Sulfuricaulis_limicola</i>          | 1.01826E-06 | RA |           |
| <i>Thalassolituus_oleivorans</i>       | 2.96825E-07 | RA | consuming |
| <i>Thermus_sp.</i>                     | 3.03962E-05 | RA | consuming |
| <i>Vibrio_furnissii</i>                | 6.20848E-10 | RA |           |

---

**Table S5 ACPA-associated species identified from NOAR cohort (Wilcoxon signed-rank test)**

| Species                               | Pvalue   | ACPA(-)mean | meanACPA(+) | ACPA(-)median | ACPA(+)-median | EnrichGroup | Qvalue      | butyrate-<br>metabolizing |
|---------------------------------------|----------|-------------|-------------|---------------|----------------|-------------|-------------|---------------------------|
| Haemophilus_parainfluenzae            | 9.60E-05 | 0.007629523 | 0.000567766 | 0.000910384   | 2.16E-05       | ACPA(-)     | 0.001195483 |                           |
| Klebsiella_oxytoca                    | 1.70E-06 | 0.006913014 | 2.65E-05    | 3.46E-05      | 1.09E-05       | ACPA(-)     | 0.000114928 |                           |
| Streptococcus_salivarius              | 2.62E-07 | 0.004515727 | 0.00051123  | 0.000933734   | 8.08E-05       | ACPA(-)     | 3.01E-05    |                           |
| Streptococcus_parasanguinis           | 8.01E-08 | 0.001443189 | 0.000196145 | 0.000636643   | 4.04E-05       | ACPA(-)     | 1.88E-05    |                           |
| Streptococcus_thermophilus            | 3.08E-08 | 0.000633825 | 6.26E-05    | 0.000241381   | 1.04E-05       | ACPA(-)     | 1.67E-05    |                           |
| Streptococcus_sp.                     | 8.68E-05 | 0.000531329 | 0.000166513 | 0.000371601   | 0.000126529    | ACPA(-)     | 0.00117981  |                           |
| Haemophilus_influenzae                | 4.04E-05 | 0.000461455 | 3.23E-05    | 7.92E-05      | 0              | ACPA(-)     | 0.00077181  |                           |
| Haemophilus_pittmaniae                | 6.59E-05 | 0.00041062  | 3.21E-05    | 5.16E-05      | 0              | ACPA(-)     | 0.001014919 |                           |
| Aggregatibacter_aphrophilus           | 6.29E-05 | 0.000233708 | 2.68E-05    | 4.41E-05      | 0              | ACPA(-)     | 0.001001482 |                           |
| Lactobacillus_ruminis                 | 4.03E-06 | 0.000212508 | 1.72E-05    | 2.57E-05      | 0              | ACPA(-)     | 0.000160045 |                           |
| Clostridium_butyricum                 | 4.38E-05 | 6.87E-05    | 1.04E-05    | 2.40E-05      | 0              | ACPA(-)     | 0.000772533 | producing                 |
| Clostridium_botulinum                 | 3.71E-06 | 4.95E-05    | 1.26E-05    | 2.63E-05      | 0              | ACPA(-)     | 0.000160045 | producing                 |
| Clostridium_cochlearium               | 2.06E-05 | 3.57E-05    | 9.02E-06    | 1.91E-05      | 1.12E-05       | ACPA(-)     | 0.000491541 | producing                 |
| Pasteurella_multocida                 | 8.60E-05 | 2.95E-05    | 1.72E-06    | 0             | 0              | ACPA(-)     | 0.00117981  |                           |
| Clostridium_baratii                   | 1.43E-05 | 2.86E-05    | 6.73E-06    | 1.43E-05      | 0              | ACPA(-)     | 0.000390694 | producing                 |
| Clostridium_kluyveri                  | 6.49E-05 | 2.77E-05    | 1.27E-05    | 2.01E-05      | 1.09E-05       | ACPA(-)     | 0.001014919 | producing                 |
| Fusobacterium_nucleatum               | 1.13E-06 | 2.61E-05    | 4.63E-06    | 1.66E-05      | 0              | ACPA(-)     | 9.09E-05    | producing                 |
| Clostridium_bornimense                | 4.27E-05 | 2.10E-05    | 2.61E-05    | 1.97E-05      | 0              | ACPA(-)     | 0.000772533 | producing                 |
| Clostridium_argentinense              | 4.05E-06 | 1.99E-05    | 2.25E-07    | 0             | 0              | ACPA(-)     | 0.000160045 | producing                 |
| Pasteurellaceae_bacterium_NI1060      | 3.78E-05 | 1.79E-05    | 0           | 0             | 0              | ACPA(-)     | 0.000733873 |                           |
| Aggregatibacter_actinomycetemcomitans | 3.11E-06 | 1.71E-05    | 8.77E-07    | 0             | 0              | ACPA(-)     | 0.000155169 |                           |
| Bibersteinia_trehalosi                | 4.37E-08 | 1.64E-05    | 5.58E-07    | 1.81E-05      | 0              | ACPA(-)     | 1.67E-05    |                           |
| Streptococcus_intermedius             | 9.56E-05 | 1.38E-05    | 3.87E-06    | 1.32E-05      | 0              | ACPA(-)     | 0.001195483 |                           |
| Clostridium_taeniosporum              | 2.44E-06 | 1.20E-05    | 0           | 1.31E-05      | 0              | ACPA(-)     | 0.000133979 | producing                 |
| Clostridium_beijerinckii              | 2.36E-07 | 1.16E-05    | 4.23E-07    | 1.22E-05      | 0              | ACPA(-)     | 3.01E-05    | producing                 |
| Filifactor_alocis                     | 4.20E-06 | 1.15E-05    | 1.61E-06    | 0             | 0              | ACPA(-)     | 0.000160516 | producing                 |
| Staphylococcus_aureus                 | 7.23E-05 | 9.39E-06    | 9.12E-07    | 0             | 0              | ACPA(-)     | 0.001088334 |                           |
| Acetoanaerobium_sticklandii           | 9.55E-05 | 8.09E-06    | 1.70E-06    | 0             | 0              | ACPA(-)     | 0.001195483 | producing                 |
| Flavonifractor_plautii                | 2.45E-05 | 0.01703252  | 0.032391894 | 0.008040113   | 0.020366549    | ACPA(+)     | 0.00053128  | producing                 |
| Bacillus_cereus                       | 5.93E-06 | 0.001226873 | 0.003167913 | 0.000150132   | 0.002015483    | ACPA(+)     | 0.000219325 |                           |

|                                         |          |             |             |          |             |         |             |           |
|-----------------------------------------|----------|-------------|-------------|----------|-------------|---------|-------------|-----------|
| <i>Pseudomonas_stutzeri</i>             | 3.07E-05 | 0.000158229 | 0.000368039 | 1.58E-05 | 0.000188325 | ACPA(+) | 0.000627834 | consuming |
| <i>Gordonibacter_pamelaeae</i>          | 3.73E-05 | 0.000133418 | 0.000949042 | 7.42E-05 | 0.000190741 | ACPA(+) | 0.000733873 |           |
| <i>Olsenella_sp.</i>                    | 2.46E-05 | 9.63E-05    | 0.000447651 | 4.17E-05 | 0.000126001 | ACPA(+) | 0.00053128  |           |
| <i>Olsenella_umbonata</i>               | 2.54E-06 | 8.11E-05    | 0.000286657 | 2.49E-05 | 0.000146333 | ACPA(+) | 0.000133979 |           |
| <i>Synechococcus_sp.</i>                | 1.57E-05 | 6.65E-05    | 0.000152775 | 3.55E-05 | 8.35E-05    | ACPA(+) | 0.000404007 |           |
| <i>Pseudomonas_sp.</i>                  | 7.71E-06 | 6.32E-05    | 0.000134045 | 1.99E-05 | 9.45E-05    | ACPA(+) | 0.000252346 | consuming |
| <i>Desulfovibrio_vulgaris</i>           | 9.45E-05 | 4.99E-05    | 0.000142877 | 2.82E-05 | 8.40E-05    | ACPA(+) | 0.001195483 |           |
| <i>Denitrobacterium_detoxificans</i>    | 6.16E-05 | 4.09E-05    | 0.000108998 | 1.24E-05 | 3.53E-05    | ACPA(+) | 0.00099505  |           |
| <i>Halomonas_aestuarii</i>              | 3.40E-06 | 3.51E-05    | 0.00010232  | 0        | 7.22E-05    | ACPA(+) | 0.000160045 |           |
| <i>Hymenobacter_sp.</i>                 | 2.27E-05 | 3.29E-05    | 7.04E-05    | 2.85E-05 | 5.97E-05    | ACPA(+) | 0.000520945 |           |
| <i>Desulfovibrio_gigas</i>              | 6.54E-06 | 2.48E-05    | 6.95E-05    | 0        | 5.46E-05    | ACPA(+) | 0.00022702  |           |
| <i>Geoalkalibacter_subterraneus</i>     | 1.50E-07 | 2.32E-05    | 8.80E-05    | 1.37E-05 | 5.70E-05    | ACPA(+) | 2.74E-05    |           |
| <i>Pelodictyon_luteolum</i>             | 1.28E-05 | 2.03E-05    | 5.85E-05    | 0        | 4.04E-05    | ACPA(+) | 0.000366648 |           |
| <i>Azospirillum_brasiliense</i>         | 7.25E-07 | 1.90E-05    | 8.25E-05    | 0        | 3.55E-05    | ACPA(+) | 6.39E-05    | consuming |
| <i>Corynebacterium_vitaeaminis</i>      | 7.31E-05 | 1.87E-05    | 4.97E-05    | 0        | 1.90E-05    | ACPA(+) | 0.001088334 |           |
| <i>Pseudomonas_putida</i>               | 2.92E-05 | 1.64E-05    | 4.40E-05    | 0        | 3.72E-05    | ACPA(+) | 0.000607598 | consuming |
| <i>Sphingomonas_sp.</i>                 | 8.92E-06 | 1.40E-05    | 3.89E-05    | 0        | 3.42E-05    | ACPA(+) | 0.000276415 | consuming |
| <i>Pontibacter_akesuensis</i>           | 1.67E-07 | 1.17E-05    | 4.36E-05    | 1.18E-05 | 3.07E-05    | ACPA(+) | 2.74E-05    |           |
| <i>Bordetella_sp.</i>                   | 1.59E-05 | 1.17E-05    | 5.55E-05    | 0        | 2.97E-05    | ACPA(+) | 0.000404007 | consuming |
| <i>Terriglobus_roseus</i>               | 6.64E-05 | 1.17E-05    | 4.24E-05    | 0        | 1.48E-05    | ACPA(+) | 0.001014919 |           |
| <i>Rhodoferax_antarcticus</i>           | 4.56E-05 | 1.07E-05    | 4.45E-05    | 0        | 1.87E-05    | ACPA(+) | 0.000791901 | consuming |
| <i>Pseudodesulfovibrio_aespoeensis</i>  | 7.50E-05 | 1.03E-05    | 4.19E-05    | 0        | 2.41E-05    | ACPA(+) | 0.001093339 |           |
| <i>Agrococcus_carbonis</i>              | 8.55E-06 | 1.02E-05    | 4.01E-05    | 0        | 2.10E-05    | ACPA(+) | 0.000272138 |           |
| <i>Deinococcus_proteolyticus</i>        | 2.30E-08 | 9.85E-06    | 4.63E-05    | 0        | 2.69E-05    | ACPA(+) | 1.67E-05    | consuming |
| <i>Desulfovibrio_sp.</i>                | 1.36E-05 | 9.02E-06    | 6.01E-05    | 0        | 2.58E-05    | ACPA(+) | 0.000381157 |           |
| <i>Verrucomicrobium_spinosum</i>        | 6.43E-06 | 8.66E-06    | 3.19E-05    | 0        | 1.76E-05    | ACPA(+) | 0.00022702  |           |
| <i>Fibrella_aestuarina</i>              | 2.59E-05 | 8.64E-06    | 5.14E-05    | 1.08E-05 | 2.09E-05    | ACPA(+) | 0.000550213 |           |
| <i>Desulfurispirillum_indicum</i>       | 1.20E-05 | 7.36E-06    | 2.99E-05    | 0        | 1.90E-05    | ACPA(+) | 0.000353295 | consuming |
| <i>Draconibacterium_orientale</i>       | 5.60E-07 | 6.40E-06    | 5.53E-05    | 0        | 2.18E-05    | ACPA(+) | 5.35E-05    |           |
| <i>Aeromonas_schubertii</i>             | 4.34E-05 | 5.21E-06    | 2.57E-05    | 0        | 1.28E-05    | ACPA(+) | 0.000772533 |           |
| <i>Methylobacterium_sp.</i>             | 9.60E-05 | 5.19E-06    | 2.14E-05    | 0        | 1.50E-05    | ACPA(+) | 0.001195483 | consuming |
| <i>Lactococcus_raffinolactis</i>        | 1.53E-05 | 4.93E-06    | 2.32E-05    | 0        | 1.31E-05    | ACPA(+) | 0.000404007 |           |
| <i>Mucilaginibacter_paludis</i>         | 2.00E-06 | 4.91E-06    | 3.75E-05    | 0        | 1.82E-05    | ACPA(+) | 0.000127089 |           |
| <i>Microbacterium_aurum</i>             | 1.36E-06 | 4.84E-06    | 2.81E-05    | 0        | 1.79E-05    | ACPA(+) | 9.76E-05    | consuming |
| <i>Magnetospirillum_gryphiswaldense</i> | 2.57E-06 | 4.59E-06    | 2.82E-05    | 0        | 1.90E-05    | ACPA(+) | 0.000133979 | consuming |

|                                      |          |          |          |   |          |         |             |           |
|--------------------------------------|----------|----------|----------|---|----------|---------|-------------|-----------|
| <i>Thermincola_potens</i>            | 4.12E-05 | 4.22E-06 | 3.28E-05 | 0 | 0        | ACPA(+) | 0.000772533 |           |
| <i>Cupriavidus_necator</i>           | 8.19E-08 | 4.11E-06 | 3.69E-05 | 0 | 1.85E-05 | ACPA(+) | 1.88E-05    | consuming |
| <i>Rubrivivax_gelatinosus</i>        | 1.88E-05 | 3.74E-06 | 2.51E-05 | 0 | 1.45E-05 | ACPA(+) | 0.000458575 | consuming |
| <i>Bacillus_amyloliquefaciens</i>    | 5.16E-05 | 3.74E-06 | 1.48E-05 | 0 | 1.14E-05 | ACPA(+) | 0.000870453 |           |
| <i>Stenotrophomonas_rhizophila</i>   | 7.73E-05 | 3.70E-06 | 1.58E-05 | 0 | 1.02E-05 | ACPA(+) | 0.001093339 |           |
| <i>Ilumatobacter_coccineus</i>       | 2.34E-05 | 3.11E-06 | 1.91E-05 | 0 | 1.40E-05 | ACPA(+) | 0.000526632 | consuming |
| <i>Serratia_ficaria</i>              | 7.68E-05 | 2.97E-06 | 1.98E-05 | 0 | 0        | ACPA(+) | 0.001093339 |           |
| <i>Kyrpidia_tusciae</i>              | 4.35E-05 | 2.68E-06 | 1.79E-05 | 0 | 1.02E-05 | ACPA(+) | 0.000772533 |           |
| <i>Vibrio_fluviialis</i>             | 1.70E-05 | 2.67E-06 | 1.32E-05 | 0 | 1.49E-05 | ACPA(+) | 0.000424186 |           |
| <i>Rhodoferax_sp.</i>                | 2.15E-05 | 2.49E-06 | 1.06E-05 | 0 | 0        | ACPA(+) | 0.000502958 | consuming |
| <i>Agrobacterium_tumefaciens</i>     | 9.28E-05 | 2.47E-06 | 1.22E-05 | 0 | 0        | ACPA(+) | 0.001195483 |           |
| <i>Neoaesaia_chiangmaiensis</i>      | 4.10E-07 | 2.37E-06 | 1.75E-05 | 0 | 1.04E-05 | ACPA(+) | 4.28E-05    |           |
| <i>Thermus_sp.</i>                   | 7.09E-06 | 2.28E-06 | 1.40E-05 | 0 | 1.11E-05 | ACPA(+) | 0.000239043 | consuming |
| <i>Neisseria_zoodegmatis</i>         | 2.05E-07 | 2.15E-06 | 2.04E-05 | 0 | 1.49E-05 | ACPA(+) | 2.94E-05    |           |
| <i>Brevundimonas_naejangsanensis</i> | 8.69E-05 | 2.08E-06 | 1.50E-05 | 0 | 1.06E-05 | ACPA(+) | 0.00117981  | consuming |
| <i>Variovorax_paradoxus</i>          | 3.89E-06 | 1.75E-06 | 3.08E-05 | 0 | 1.47E-05 | ACPA(+) | 0.000160045 | consuming |
| <i>Pseudomonas_cichorii</i>          | 7.57E-05 | 1.64E-06 | 1.54E-05 | 0 | 0        | ACPA(+) | 0.001093339 | consuming |
| <i>Nakamurella_panacisegetis</i>     | 4.66E-05 | 1.25E-06 | 1.57E-05 | 0 | 0        | ACPA(+) | 0.000797326 |           |
| <i>Robiginitalea_biformata</i>       | 3.33E-05 | 1.19E-06 | 1.12E-05 | 0 | 1.01E-05 | ACPA(+) | 0.000668763 |           |
| <i>Bordetella_bronchialis</i>        | 1.02E-05 | 1.14E-06 | 1.06E-05 | 0 | 0        | ACPA(+) | 0.000306645 | consuming |
| <i>Pseudomonas_poae</i>              | 8.88E-05 | 1.09E-06 | 2.38E-05 | 0 | 0        | ACPA(+) | 0.001182713 | consuming |
| <i>Kitasatospora_aureofaciens</i>    | 1.19E-06 | 1.04E-06 | 2.12E-05 | 0 | 1.02E-05 | ACPA(+) | 9.09E-05    | consuming |
| <i>Brevibacterium_linens</i>         | 2.52E-06 | 0        | 2.24E-05 | 0 | 1.16E-05 | ACPA(+) | 0.000133979 | consuming |
| <i>Gardnerella_vaginalis</i>         | 3.85E-06 | 0        | 3.77E-05 | 0 | 0        | ACPA(+) | 0.000160045 |           |
| <i>Bacillus_horikoshii</i>           | 5.79E-05 | 0        | 6.82E-06 | 0 | 0        | ACPA(+) | 0.000961739 |           |
| <i>Rhodopirellula_baltica</i>        | 5.96E-05 | 0        | 9.48E-06 | 0 | 0        | ACPA(+) | 0.000975513 |           |
| <i>Sulfuriferula_sp.</i>             | 8.75E-05 | 0        | 8.84E-06 | 0 | 0        | ACPA(+) | 0.00117981  |           |

**Table S6. Demographic and clinical information of the validation cohort**

| <b>Characteristic</b>                     | <b>RA<br/>(n=37)</b> | <b>HC<br/>(n=31)</b> | <b>p value</b> |
|-------------------------------------------|----------------------|----------------------|----------------|
| Age, year, median (range)                 | 56 (49-64)           | 55 (51, 60)          | 0.8506         |
| Female/Male                               | 29/8                 | 24/7                 | 0.926          |
| BMI, median (range)                       | 23.4 (20.3, 25.9)    | 23.4 (22.5, 27.7)    | 0.1285         |
| Duration, years, median (range)           | 8.0 (3.5-20.0)       | N/A                  | N/A            |
| Clinical parameters                       |                      |                      |                |
| ESR, mm/h, median (range)                 | 33 (11, 58)          | N/A                  | N/A            |
| CRP, mg/l, median (range)                 | 12.1 (3.2, 33.3)     | N/A                  | N/A            |
| DAS28-ESR, median (range)                 | 4.9 (3.8, 6.1)       | N/A                  | N/A            |
| DAS28-CRP, median (range)                 | 4.4 (3.4, 5.5)       | N/A                  | N/A            |
| TJC-28, median (range)                    | 4 (1, 15)            | N/A                  | N/A            |
| SJC-28, median (range)                    | 3 (0, 12)            | N/A                  | N/A            |
| DJC-28, n (%)                             | 23 (62.2)            | N/A                  | N/A            |
| Anti-CCP, IU/ml, median (range)           | 163.4 ( 38.5-213.1)  | N/A                  | N/A            |
| IgM-RF, IU/ml, median (range)             | 120 (20-682)         | N/A                  | N/A            |
| Medication use, n, (%)                    |                      |                      |                |
| Methotrexate or/and other DEMARDS, n, (%) | 25 (67.6)            | N/A                  | N/A            |
| Prednisone, n, (%)                        | 12 (32.4)            | N/A                  | N/A            |
| Biological agent, n, (%)                  | 2 (5.4)              | N/A                  | N/A            |

| <b>Characteristic</b>           | <b>DJ<br/>(n=13)</b> | <b>NDJ<br/>(n=24)</b> | <b>p value</b> |
|---------------------------------|----------------------|-----------------------|----------------|
| Age, year, median (range)       | 52 (30, 69)          | 58 (39-70)            | 0.2938         |
| Female/Male                     | 11/2                 | 18/6                  | 0.511          |
| BMI, median (range)             | 21.5 (20.2, 30.4)    | 23.4(17.7, 26.7)      | 0.3018         |
| Duration, years, median (range) | 12.9 (1.0-20.0)      | 9.0 (1-30.0)          | 0.087          |
| Clinical parameters             |                      |                       |                |
| ESR, mm/h, median (range)       | 36 (5, 92)           | 25 (8, 102)           | 0.0503         |
| CRP, mg/l, median (range)       | 19.1 (0.4, 80.4)     | 8.7 (1.1, 64.7)       | 0.1367         |
| DAS28-ESR, median (range)       | 4.7 (1.3, 7.5)       | 4.8 (1.7, 7.6)        | 0.4453         |
| DAS28-CRP, median (range)       | 4.0 (1.4, 6.2)       | 4.3 (2.0, 7.1)        | 0.6919         |
| TJC-28, median (range)          | 3 (0, 28)            | 5 (0, 28)             | 0.8182         |
| SJC-28, median (range)          | 4 (0, 20)            | 2 (0, 28)             | 0.1437         |
| DJC-28, n (%)                   | 6 (2, 20)            | 0 (0, 0)              | <0.0001        |
| Anti-CCP, IU/ml, median (range) | 152.7 ( 4.7-268.9)   | 169.7 ( 2.7-236.2)    | 0.8692         |
| IgM-RF, IU/ml, median (range)   | 121.0 (20-2400)      | 82.75 (20-5840)       | 0.7226         |
| Medication use, n, (%)          |                      |                       |                |
| Methotrexate                    | 6 (42.9)             | 12 (52.2)             | 0.829          |
| other DEMARDS, n, (%)           | 7 (57.1)             | 12 (52.2)             | 0.486          |
| Prednisone, n, (%)              | 5 (35.7)             | 11 (47.8)             | 0.676          |
| Biological agent, n, (%)        | 3 (21.4)             | 7 (30.4)              | 0.7            |

**Table S7. List of antibodies used in the study**

| <b>Antibodies</b>                                                 | <b>source</b> | <b>Cat#</b> |
|-------------------------------------------------------------------|---------------|-------------|
| Alexa Fluor® 700 anti-human CD3                                   | Biolegend     | 317340      |
| FITC anti-human CD4                                               | Biolegend     | 344604      |
| PerCP anti-human CD8                                              | Biolegend     | 344708      |
| APC anti-human CD185 (CXCR5)                                      | Biolegend     | 356908      |
| Biotin anti-human CD279 (PD-1)                                    | Biolegend     | 329934      |
| PE/Cy7 Streptavidin                                               | Biolegend     | 405206      |
| Brilliant Violet 421™ anti-human CD197 (CCR7)                     | Biolegend     | 353208      |
| PE/Dazzle™ 594 anti-human CD183 (CXCR3)                           | Biolegend     | 353736      |
| Zombie NIR™ Fixable Viability Kit                                 | Biolegend     | 423106      |
| PE anti-human CD25                                                | Biolegend     | 302606      |
| Brilliant Violet 510™ anti-human CD45RA                           | Biolegend     | 304142      |
| Brilliant Violet 605™ anti-human CD127 (IL-7R $\alpha$ )          | Biolegend     | 351334      |
| Brilliant Violet 650™ anti-human CD196 (CCR6)                     | Biolegend     | 353426      |
| FITC anti-mouse CD4                                               | Biolegend     | 100406      |
| PerCP/Cyanine5.5 anti-mouse CD4                                   | Biolegend     | 100434      |
| PE/Cy7 anti-mouse/human CD11b                                     | Biolegend     | 101216      |
| Alexa Fluor® 700 anti-mouse/human CD45R/B220                      | Biolegend     | 103232      |
| PerCP/Cyanine5.5 anti-mouse CD1d (CD1.1, Ly-38)                   | Biolegend     | 123514      |
| Anti-Human/Mouse GL7 (T and B Cell Activation Marker) eFluor® 660 | eBioscience   | 50-5902-82  |
| Brilliant Violet 650™ anti-mouse IgD                              | Biolegend     | 405721      |
| Brilliant Violet 421™ anti-mouse CD5                              | Biolegend     | 100618      |
| PE/Dazzle™ 594 anti-mouse CD138 (Syndecan-1)                      | Biolegend     | 142528      |
| Anti-Mouse CD95 (APO-1/Fas) PE                                    | eBioscience   | 12-0951-81  |
| FITC anti-mouse CD3                                               | Biolegend     | 100204      |
| APC/Cy7 anti-mouse CD8a                                           | Biolegend     | 100714      |
| FITC anti-mouse/human CD44                                        | Biolegend     | 103006      |
| PE/Cy7 anti-mouse CD25                                            | Biolegend     | 102016      |
| Brilliant Violet 421™ anti-mouse CD4                              | Biolegend     | 100438      |
| Biotin anti-mouse CD185 (CXCR5)                                   | Biolegend     | 145510      |
| APC anti-human/mouse Bcl-6                                        | Biolegend     | 358506      |



|                                                |             |            |
|------------------------------------------------|-------------|------------|
| Zombie Aqua™ Fixable Viability Kit             | Biolegend   | 423102     |
| Biotin anti-mouse CD185 (CXCR5)<br>SA-PE-CY5.5 | Biolegend   | 145510     |
| Ms IL-17A PE TC11-18H10 100ug                  | life        | SA1018     |
| Ms IFN-Gma APC XMG1.2 100ug                    | BD          | 559502     |
| Anti-Mouse/Rat Foxp3 PE-eFluor® 610 100 ug     | BD          | 554413     |
|                                                | eBioscience | 61-5773-82 |

---
